# Supplementary material for: Improving Properties of Podophyllic Aldehyde-Derived Cyclolignans: Design, Synthesis and Evaluation of Novel Lignohydroquinones, Dual-Selective Hybrids against Colorectal Cancer Cells
Source: MDPI journal article supplement (doi:10.3390/pharmaceutics15030886), 2023-03-09
Supplement: s1 [file s1]

**Table S1:** Cytotoxicity (IC<sub>50</sub>,  $\mu\text{M} \pm \text{SD}$ ) of the precursors (**1-3**) and synthesized compound (**10-12** and **16-17**) at 24 and 72 h of incubation.

| Time incubation | Compound  | MG-63             | MCF-7             | HT-29             |
|-----------------|-----------|-------------------|-------------------|-------------------|
| 24 h            | <b>1</b>  | 18.3 $\pm$ 1.4    | >100              | 0.066 $\pm$ 0.002 |
|                 | <b>2</b>  | 1.23 $\pm$ 0.06   | >100              | 0.028 $\pm$ 0.006 |
|                 | <b>5</b>  | 1.11 $\pm$ 0.18   | 8.23 $\pm$ 0.05   | 4.33 $\pm$ 1.73   |
|                 | <b>15</b> | 2.8 $\pm$ 0.06    | 1.38 $\pm$ 0.14   | 4.77 $\pm$ 0.20   |
|                 | <b>16</b> | 2.7 $\pm$ 0.04    | 8.81 $\pm$ 0.21   | 4.16 $\pm$ 0.15   |
|                 | <b>17</b> | 0.75 $\pm$ 0.12   | 13.09 $\pm$ 0.04  | 4.12 $\pm$ 0.05   |
| 72 h            | <b>1</b>  | 0.028 $\pm$ 0.003 | 0.007 $\pm$ 0.005 | >100              |
|                 | <b>2</b>  | 0.48 $\pm$ 0.03   | 0.06 $\pm$ 0.02   | >100              |
|                 | <b>5</b>  | 4.93 $\pm$ 0.76   | 4.93 $\pm$ 0.76   | 8.51 $\pm$ 0.01   |
|                 | <b>9</b>  | 1.82 $\pm$ 0.18   | 3.97 $\pm$ 0.23   | 0.26 $\pm$ 0.07   |
|                 | <b>10</b> | 0.55 $\pm$ 0.35   | 0.87 $\pm$ 0.13   | 0.88 $\pm$ 0.41   |
|                 | <b>11</b> | 4.45 $\pm$ 3.68   | 4.86 $\pm$ 0.98   | 2.90 $\pm$ 0.84   |
|                 | <b>15</b> | 2.33 $\pm$ 0.78   | 2.26 $\pm$ 0.88   | 0.83 $\pm$ 0.25   |
|                 | <b>16</b> | 2.34 $\pm$ 0.25   | 0.26 $\pm$ 0.08   | 0.65 $\pm$ 0.02   |
|                 | <b>17</b> | 1.78 $\pm$ 0.20   | 0.29 $\pm$ 0.17   | 0.041 $\pm$ 0.005 |

**Table S2:** % apoptotic cells (ratios Annexin +/- and PI +/-) at 24 h of incubation

|       | Compound | Concentration | Annexin -<br>(%) | Annexin +    |            |            |
|-------|----------|---------------|------------------|--------------|------------|------------|
|       |          |               |                  | Total<br>(%) | PI-<br>(%) | PI+<br>(%) |
| MCF-7 |          | Control       | 83.50            | 16.50        | 17.76      | 86.24      |
|       | 1        | 1 $\mu$ M     | 75.36            | 24.64        | 91.33      | 8.67       |
|       | 2        | 1 $\mu$ M     | 78.86            | 21.14        | 89.04      | 10.96      |
|       | 3        | 1 $\mu$ M     | 38.69            | 61.04        | 52.87      | 47.13      |
|       | 16       | 1 $\mu$ M     | 84.07            | 15.93        | 56.33      | 43.47      |
|       | 17       | 1 $\mu$ M     | 83.37            | 16.63        | 40.81      | 59.19      |
|       | 18       | 1 $\mu$ M     | 81.49            | 18.51        | 20.03      | 79.97      |
| MG-63 |          | Control       | 89.58            | 10.42        | 33.32      | 66.68      |
|       | 1        | 1 $\mu$ M     | 51.44            | 48.56        | 64.62      | 35.38      |
|       | 2        | 1 $\mu$ M     | 51.92            | 48.08        | 81.29      | 18.71      |
|       | 3        | 1 $\mu$ M     | 38.69            | 61.04        | 52.87      | 47.13      |
|       | 16       | 1 $\mu$ M     | 70.22            | 29.78        | 93.12      | 6.88       |
|       | 17       | 1 $\mu$ M     | 71.33            | 28.66        | 62.35      | 37.65      |
|       | 18       | 1 $\mu$ M     | 65.26            | 34.74        | 83.25      | 16.75      |
| HT-29 |          | Control       | 94.70            | 5.30         | 22.55      | 77.45      |
|       | 1        | 1 $\mu$ M     | 94.70            | 5.30         | 22.55      | 77.45      |
|       | 2        | 1 $\mu$ M     | 83.11            | 16.89        | 79.60      | 20.40      |
|       |          | 0.1 $\mu$ M   | 87.47            | 12.53        | 92.01      | 7.99       |
|       |          | 0.01 $\mu$ M  | 86.97            | 13.04        | -          | -          |
|       | 3        | 1 $\mu$ M     | 52.85            | 48.15        | 11.41      | 88.59      |
|       |          | 0.1 $\mu$ M   | 93.60            | 6.40         | -          | -          |
|       |          | 0.01 $\mu$ M  | 94.10            | 5.90         | -          | -          |
|       | 16       | 1 $\mu$ M     | 88.79            | 11.21        | 56.33      | 43.47      |
|       | 17       | 1 $\mu$ M     | 88.98            | 11.02        | 40.81      | 59.19      |
|       | 18       | 1 $\mu$ M     | 64.94            | 35.06        | 13.02      | 86.98      |
|       |          | 0.1 $\mu$ M   | 89.29            | 13.71        | -          | -          |
|       |          | 0.01 $\mu$ M  | 94.35            | 5.65         | -          | -          |

**Table S3:** % apoptotic cells (ratios Annexin) at 48 h of incubation in HT-29 cell line.

| Compound  | Concentration  | Annexin - (%) | Annexin + (%) |
|-----------|----------------|---------------|---------------|
| <b>2</b>  | <b>Control</b> | 90.90         | 10.10         |
|           | 1 $\mu$ M      | 87.92         | 12.08         |
|           | 0.1 $\mu$ M    | 87.58         | 12.42         |
|           | 0.01 $\mu$ M   | 91.20         | 8.80          |
| <b>3</b>  | <b>Control</b> | 86.43         | 13.50         |
|           | 1 $\mu$ M      | 87.92         | 12.08         |
|           | 0.1 $\mu$ M    | 89.35         | 10.65         |
|           | 0.01 $\mu$ M   | 91.32         | 8.68          |
| <b>18</b> | 1 $\mu$ M      | 43.67         | 56.30         |
|           | 0.1 $\mu$ M    | 44.79         | 55.21         |
|           | 0.01 $\mu$ M   | 71.14         | 27.86         |

**Table S4:** results (%) of cells in each cell cycle phase at 24 of incubation

|                | MG63  |       |       | MCF7  |       |       | HT-29 |       |       |
|----------------|-------|-------|-------|-------|-------|-------|-------|-------|-------|
|                | G0/G1 | S     | G2/M  | G0/G1 | S     | G2/M  | G0/G1 | S     | G2/M  |
| <b>1</b>       | 0     | 0     | 100   | 0     | 0     | 100   | 3.1   | 26.02 | 70.85 |
| <b>2</b>       | 0     | 0     | 100   | 3.76  | 1.80  | 94.63 | 2.15  | 5.62  | 92.29 |
| <b>3</b>       | 55.04 | 11.64 | 34.83 | 73.09 | 7.02  | 19.89 | 59.99 | 10.92 | 29.10 |
| <b>16</b>      | 64.07 | 13.90 | 24.29 | 74.03 | 7.85  | 18.13 | 49.45 | 10.48 | 40.07 |
| <b>17</b>      | 67.11 | 13.24 | 21.33 | 76.16 | 8.80  | 15.05 | 62.72 | 14.80 | 22.49 |
| <b>18</b>      | 43.16 | 18.41 | 47.03 | 35.00 | 9.38  | 55.63 | 10.42 | 5.03  | 84.55 |
| <b>Control</b> | 56.49 | 14.74 | 28.15 | 62.65 | 14.87 | 23.93 | 61.92 | 13.02 | 25.03 |

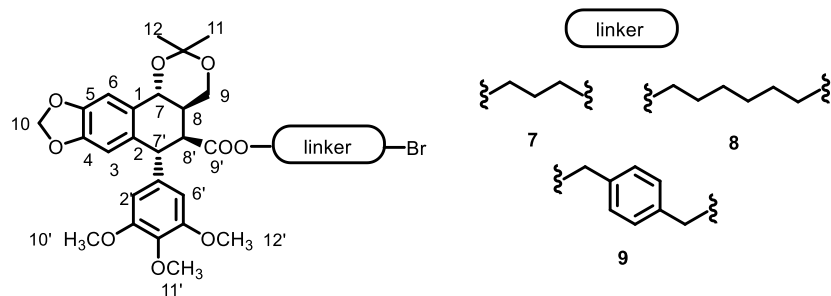

**Table S5:**  $^1\text{H}$  NMR for compound **7-9**,  $\delta$  in ppm ( $J$  in Hz)

|                    | <b>H</b> | <b>7</b>                                    | <b>8</b>                       | <b>9</b>                                    |
|--------------------|----------|---------------------------------------------|--------------------------------|---------------------------------------------|
| <b>Cyclolignan</b> | 3        | 6.31 <i>s</i>                               | 6.36 <i>s</i>                  | 6.39 <i>s</i>                               |
|                    | 6        | 6.99 <i>s</i>                               | 6.95 <i>s</i>                  | 6.95 <i>s</i>                               |
|                    | 7        | 4.86 <i>d</i> (11.2)                        | 4.92 <i>d</i> (14.0 Hz)        | 4.86 <i>d</i> (11.2)                        |
|                    | 8        | 2.26 <i>m</i>                               | 2.25 <i>m</i>                  | 2.25 <i>m</i>                               |
|                    | 9        | 4.02 <i>m</i><br>3.63 <i>dd</i> (4.8, 12.0) | 3.67 <i>m</i><br>3.96 <i>m</i> | 4.00 <i>m</i><br>3.62 <i>dd</i> (2.4, 11.2) |
|                    | 10       | 5.82 <i>s</i>                               | 5.87 <i>s</i>                  | 5.90 <i>s</i>                               |
|                    | 12, 13   | 1.42 <i>s</i> ; 1.55 <i>s</i>               | 1.34 <i>s</i> ; 1.51 <i>s</i>  | 1.44 <i>s</i> ; 1.55 <i>s</i>               |
|                    | 2' 6'    | 6.20 <i>s</i>                               | 6.27 <i>s</i>                  | 6.24 <i>s</i>                               |
|                    | 7'       | 4.31 <i>bs</i>                              | 4.37 <i>bs</i>                 | 4.40 <i>bs</i>                              |
|                    | 8'       | 2.71 <i>dd</i> (2.0, 4.8)                   | 2.76 <i>m</i>                  | 2.82 <i>dd</i> (2.0, 4.4)                   |
|                    | 10' 12'  | 3.76 <i>s</i>                               | 3.74 <i>s</i>                  | 3.75 <i>s</i>                               |
|                    | 11'      | 3.71 <i>s</i>                               | 3.70 <i>s</i>                  | 3.72 <i>s</i>                               |
| <b>linker</b>      |          |                                             |                                | 4.36 <i>m</i>                               |
|                    |          | 4.04 <i>m</i>                               | 4.02 <i>m</i>                  | 5.09 <i>d</i> (6.8)                         |
|                    |          | 3.38 <i>m</i>                               | 3.99 <i>m</i>                  | 5.19 <i>d</i> (6.8)                         |
|                    |          | 2.10 <i>m</i>                               | 1.36-1.89 <i>m</i>             | 7.10 <i>d</i> (8.0)<br>7.30 <i>d</i> (8.0)  |



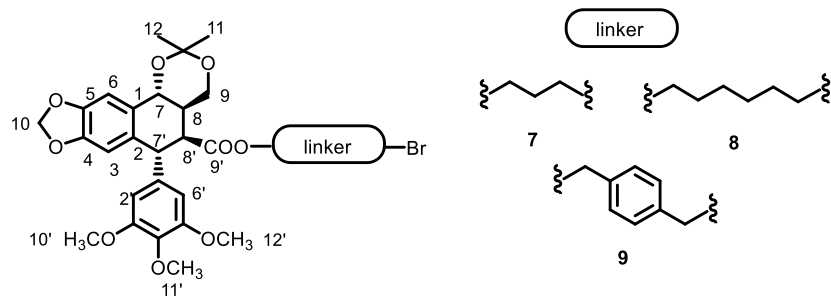

**Table S6:**  $^{13}\text{C}$  NMR for compound **7-9**,  $\delta$  in ppm.

|                    | <b>C</b> | <b>7</b>         | <b>8</b>                              | <b>9</b>                                                |
|--------------------|----------|------------------|---------------------------------------|---------------------------------------------------------|
| <b>Cyclolignan</b> | 1        | 116.5            | 116.7                                 | 116.5                                                   |
|                    | 2        | 130.6            | 130.8                                 | 130.8                                                   |
|                    | 3        | 106.2            | 106.1                                 | 105.9                                                   |
|                    | 4        | 147.4            | 147.1                                 | 147.3                                                   |
|                    | 5        | 150.3            | 150.0                                 | 150.2                                                   |
|                    | 6        | 109.3            | 109.5                                 | 109.6                                                   |
|                    | 7        | 68.0             | 67.9                                  | 68.1                                                    |
|                    | 8        | 29.0             | 28.9                                  | 28.7                                                    |
|                    | 9        | 63.7             | 63.9                                  | 63.9                                                    |
|                    | 10       | 101.0            | 100.9                                 | 100.7                                                   |
|                    | 11       | 99.6             | 99.7                                  | 99.7                                                    |
|                    | 12. 13   | 19.5. 29.7       | 19.5. 29.9                            | 19.5. 29.8                                              |
|                    | 1'       | 140.8            | 140.6                                 | 140.6                                                   |
|                    | 2'6'     | 104.8            | 104.7                                 | 104.6                                                   |
|                    | 3'5'     | 153.3            | 153.1                                 | 153.2                                                   |
|                    | 4'       | 141.8            | 141.9                                 | 141.7                                                   |
|                    | 7'       | 47.0             | 46.8                                  | 47.1                                                    |
|                    | 8'       | 35.2             | 34.9                                  | 34.8                                                    |
|                    | 9'       | 172.7            | 172.9                                 | 172.9                                                   |
|                    | 10' 12'  | 59.7             | 59.7                                  | 59.7                                                    |
|                    | 11'      | 60.9             | 60.8                                  | 61.0                                                    |
| <b>linker</b>      |          | 39.2. 63.1. 65.0 | 28.3. 28.8. 35.3.<br>38.9. 63.1. 64.9 | 63.4. 65.7. 125.6. 125.8.<br>128.2. 128.7. 136.4. 136.7 |

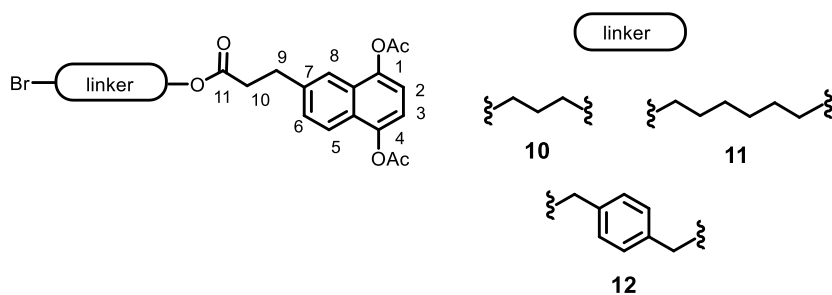

**Table S7:**  $^1\text{H}$  NMR for compound **10-12**,  $\delta$  in ppm ( $J$  in Hz)

| H                      | 10                        | 11                        | 12                        |
|------------------------|---------------------------|---------------------------|---------------------------|
| 2                      | 7.21 <i>d</i> (8.0)       | 7.21 <i>d</i> (8.0)       | 7.22 <i>d</i> (8.0)       |
| 3                      | 7.17 <i>d</i> (8.0)       | 7.17 <i>d</i> (8.0)       | 7.20 <i>d</i> (8.0)       |
| C1-CO-OCH <sub>3</sub> | 2.39 <i>s</i>             | 2.39 <i>s</i>             | 2.46 <i>s</i>             |
| C4-CO-OCH <sub>3</sub> | 2.37 <i>s</i>             | 2.37 <i>s</i>             | 2.46 <i>s</i>             |
| 5                      | 7.71 <i>d</i> (8.8)       | 7.71 <i>d</i> (8.8)       | 7.80 <i>d</i> (8.8)       |
| 7                      | 7.32 <i>dd</i> (1.8; 8.8) | 7.32 <i>dd</i> (1.8; 8.8) | 7.38 <i>dd</i> (1.8; 8.8) |
| 8                      | 7.66 <i>d</i> (1.8)       | 7.66 <i>d</i> (1.8)       | 7.66 <i>d</i> (1.8)       |
| 9                      | 3.03 <i>t</i> (8)         | 3.03 <i>t</i> (8)         | 3.15 <i>t</i> (7.6)       |
| 10                     | 2.60 <i>t</i> (8)         | 2.60 <i>t</i> (8)         | 2.78 <i>t</i> (7.6)       |
|                        |                           | 3.97 <i>t</i> (6.8)       |                           |
|                        | 4.04 <i>t</i> (7.2)       | 1.71 <i>m</i>             | 5.10 <i>s</i>             |
|                        | 1.96 <i>m</i>             | 1.27 <i>m</i>             | 7.33 <i>d</i> (8.4)       |
|                        | 3.22 <i>t</i> (6.4)       | 1.19 <i>m</i>             | 7.26 <i>d</i> (8.4)       |
|                        |                           | 1.48 <i>m</i>             | 4.47 <i>s</i>             |
|                        |                           | 3.28 <i>t</i> (7.2)       |                           |

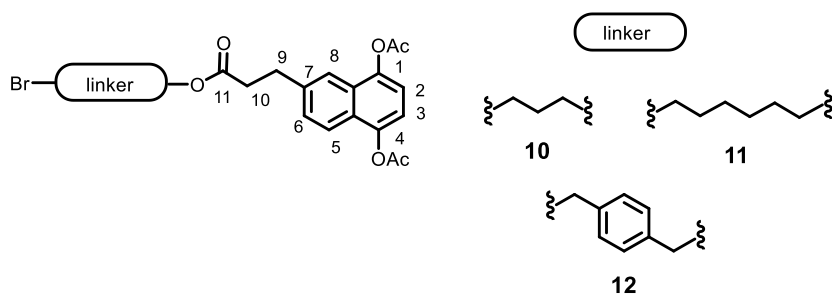

**Table S8:**  $^{13}\text{C}$  NMR for compound **10-12**,  $\delta$  in ppm.

| <b>C</b>                               | <b>10</b> | <b>11</b> | <b>12</b> |
|----------------------------------------|-----------|-----------|-----------|
| <b>1</b>                               | 144.7     | 147.2     | 147.5     |
| <b>2</b>                               | 118.1     | 117.1     | 117.9     |
| <b>3</b>                               | 117.2     | 117.4     | 117.1     |
| <b>4</b>                               | 144.5     | 147.0     | 147.2     |
| <b>4a</b>                              | 126.7     | 126.4     | 127.1     |
| <b>5</b>                               | 122.9     | 122.2     | 122.3     |
| <b>6</b>                               | 129.0     | 128.3     | 129.2     |
| <b>7</b>                               | 142.5     | 140.9     | 140.5     |
| <b>8</b>                               | 120.4     | 120.2     | 120.3     |
| <b>8a</b>                              | 128.3     | 128.0     | 127.9     |
| <b>9</b>                               | 34.1      | 35.1      | 35.6      |
| <b>10</b>                              | 33.1      | 31.5      | 31.2      |
| <b>11</b>                              | 177.8     | 177.8     | 177.3     |
| <b>-O<u>C</u>CH<sub>3</sub></b>        | 169.9     | 169.6     | 169.4     |
| <b>-O<u>C</u><u>C</u>H<sub>3</sub></b> | 21.5      | 21.2      | 20.0      |
| <b>C<sub>H</sub>OOR</b>                |           | 27.4      | 31.1      |
|                                        | 29.1      | 27.7      | 127.0     |
|                                        | 35.5      | 38.4      | 128.7     |
|                                        | 64.5      | 33.8      | 129.4     |
|                                        |           | 64.8      | 133.3     |
|                                        |           |           | 136.6     |

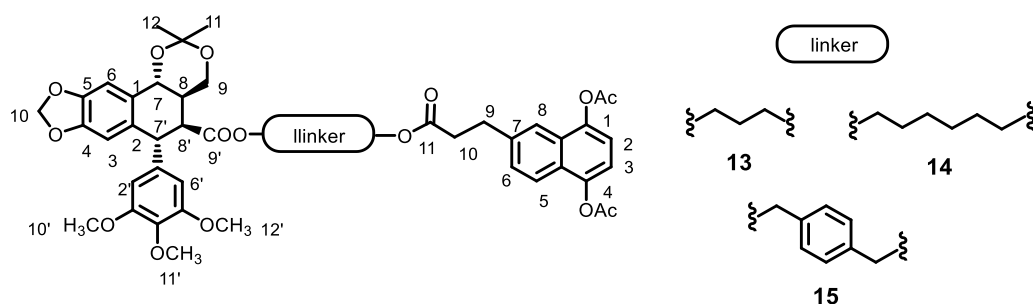

**Table S9:**  $^1\text{H}$  NMR for compound **13-15**,  $\delta$  in ppm ( $J$  in Hz)

| H           |          | 13                                              | 14                                                   | 15                                                                                         |
|-------------|----------|-------------------------------------------------|------------------------------------------------------|--------------------------------------------------------------------------------------------|
| MHQ         | 2        | 7.21 <i>d</i> (8.0)                             | 7.21 <i>d</i> (8.0)                                  | 7.22 <i>d</i> (8.0)                                                                        |
|             | 3        | 7.17 <i>d</i> (8.0)                             | 7.17 <i>d</i> (8.0)                                  | 7.18 <i>d</i> (8.0)                                                                        |
|             | 5        | 4.90 <i>s</i>                                   | 7.78 <i>d</i> (8.8)                                  | 7.78 <i>d</i> (8.0)                                                                        |
|             | 7        | 1.19 <i>s</i>                                   | 7.40 <i>dd</i><br>(2.0; 8.8)                         | 7.39 <i>dd</i><br>(1.8; 8.0)                                                               |
|             | 8        | 0.43 <i>s</i>                                   | 7.64 <i>d</i> (2.0)                                  | 7.66 <i>d</i> (1.8)                                                                        |
|             | 9        | 7.12 <i>d</i> (8.0)                             | 3.11 <i>t</i> (7.6)                                  | 3.14 <i>t</i> (7.6)                                                                        |
|             | 10       | 7.14 <i>d</i> (8.0)                             | 2.66 <i>t</i> (7.6)                                  | 2.82 <i>t</i> (7.6)                                                                        |
|             | -OAc     | 2.44 <i>s</i> ; 2.45 <i>s</i>                   | 2.44 <i>s</i> ; 2.45 <i>s</i>                        | 2.45 <i>s</i>                                                                              |
| linker      |          | 4.02 <i>m</i><br>1.80 <i>m</i><br>1.25 <i>m</i> | 4.02 <i>m</i><br>3.99 <i>m</i><br>1.25-1.80 <i>m</i> | 5.19 <i>d</i> (10.4)<br>5.09 <i>d</i> (10.4)<br>7.24 <i>d</i> (7.6)<br>7.10 <i>d</i> (7.6) |
| Cyclolignan | 3        | 6.38 <i>s</i>                                   | 6.38 <i>s</i>                                        | 6.39 <i>s</i>                                                                              |
|             | 6        | 6.97 <i>s</i>                                   | 6.97 <i>s</i>                                        | 6.95 <i>s</i>                                                                              |
|             | 7        | 4.90 <i>d</i> (10.8)                            | 4.90 <i>d</i> (10.8)                                 | 4.75 <i>d</i> (10.8)                                                                       |
|             | 8        | 2.17 <i>m</i>                                   | 2.17 <i>m</i>                                        | 2.25 <i>m</i>                                                                              |
|             | 9        | 4.04 <i>m</i><br>3.68 <i>dd</i><br>(4.4; 11.2)  | 4.04 <i>m</i><br>3.68 <i>dd</i><br>(4.4; 11.2)       | 3.96 <i>t</i> (11.6)<br>3.63 <i>dd</i><br>(3.6; 11.6)                                      |
|             | 10       | 5.89 <i>s</i>                                   | 5.89 <i>s</i>                                        | 5.90 <i>s</i>                                                                              |
|             | 12, 13   | 1.49 <i>s</i> ; 1.55 <i>s</i>                   | 1.49 <i>s</i> ; 1.55 <i>s</i>                        | 1.34 <i>s</i> ; 1.51 <i>s</i>                                                              |
|             | 2', 6'   | 6.25 <i>s</i>                                   | 6.25 <i>s</i>                                        | 6.24 <i>s</i>                                                                              |
|             | 7'       | 4.72 <i>d</i> (10.2)                            | 4.72 <i>d</i> (10.2)                                 | 4.74 <i>d</i> (10.8)                                                                       |
|             | 8'       | 2.78 <i>m</i>                                   | 2.78 <i>m</i>                                        | 2.25 <i>m</i>                                                                              |
|             | 10', 12' | 3.78 <i>s</i>                                   | 3.78 <i>s</i>                                        | 3.74 <i>s</i>                                                                              |
|             | 11'      | 3.83 <i>s</i>                                   | 3.83 <i>s</i>                                        | 3.79 <i>s</i>                                                                              |

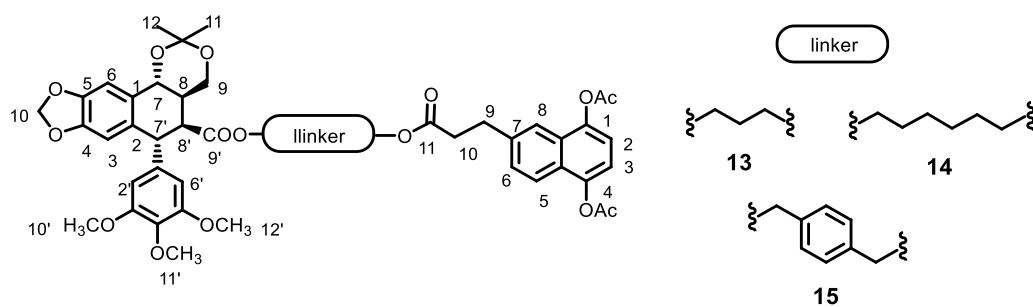

**Table S10:**  $^{13}\text{C}$  NMR for compound **13-15**,  $\delta$  in ppm.

|                    |                                    | <b>13</b>        | <b>14</b>                            | <b>15</b>                                 |
|--------------------|------------------------------------|------------------|--------------------------------------|-------------------------------------------|
| <b>MHQ</b>         | <b>C</b>                           |                  |                                      |                                           |
|                    | 1                                  | 147.0            | 147.2                                | 147.5                                     |
|                    | 2                                  | 117.9            | 118.1                                | 117.9                                     |
|                    | 3                                  | 117.2            | 117.4                                | 117.1                                     |
|                    | 4                                  | 147.0            | 147.0                                | 147.2                                     |
|                    | 4a                                 | 126.3            | 126.4                                | 127.1                                     |
|                    | C <sub>1</sub> CO-OCH <sub>3</sub> | 169.3; 21.0      | 169.6; 21.3                          | 169.4; 20.0                               |
|                    | C <sub>4</sub> CO-OCH <sub>3</sub> | 169.3; 21.0      | 169.6; 21.2                          | 169.6; 20.0                               |
|                    | 5                                  | 122.0            | 122.2                                | 122.3                                     |
|                    | 6                                  | 128.4            | 128.3                                | 129.2                                     |
|                    | 7                                  | 140.5            | 140.9                                | 140.5                                     |
|                    | 8                                  | 120.3            | 120.2                                | 120.3                                     |
|                    | 8a                                 | 128.0            | 128.0                                | 127.9                                     |
|                    | 9                                  | 35.6             | 35.1                                 | 35.6                                      |
|                    | 10                                 | 31.6             | 31.5                                 | 31.2                                      |
|                    | 11                                 | 122.0            | 122.2                                | 122.3                                     |
| <b>Cyclolignan</b> | <b>linker</b>                      | 35.2; 65.8; 66.3 | 65.0; 64.6; 35.1<br>28.7; 25.7; 25.6 | 136.2; 135.4; 128.7;<br>128.7; 67.2; 66.9 |
|                    | 1                                  | 126.3            | 126.6                                | 128.0                                     |
|                    | 2                                  | 130.8            | 131.1                                | 130.8                                     |
|                    | 3                                  | 105.1            | 105.0                                | 104.7                                     |
|                    | 4                                  | 147.1            | 147.2                                | 147.0                                     |
|                    | 5                                  | 150.0            | 147.2                                | 146.9                                     |
|                    | 6                                  | 109.5            | 109.7                                | 109.5                                     |
|                    | 7                                  | 67.9             | 68.1                                 | 67.8                                      |
|                    | 8                                  | 29.0             | 35.8                                 | 34.9                                      |
|                    | 9                                  | 63.7             | 63.3                                 | 62.9                                      |
|                    | 10                                 | 101.0            | 99.9                                 | 101.0                                     |
|                    | 11                                 | 99.6             | 98.7                                 | 99.6                                      |
|                    | 12. 13                             | 30.0; 19.6       | 30.1; 19.8                           | 29.9; 19.3                                |
|                    | 1'                                 | 137.3            | 138.2                                | 140.5                                     |
|                    | 2'6'                               | 106.4            | 106.4                                | 106.1                                     |
|                    | 3'5'                               | 152.9            | 153.3                                | 153.1                                     |
|                    | 4'                                 | 137.9            | 137.7                                | 136.8                                     |
|                    | 7'                                 | 46.8             | 47.0                                 | 46.6                                      |
|                    | 8'                                 | 68.0             | 68.1                                 | 67.8                                      |
|                    | 9'                                 | 172.1            | 173.1                                | 172.4                                     |
|                    | 10' 12'                            | 56.2             | 56.4                                 | 60.8                                      |
|                    | 11'                                | 60.8             | 61.1                                 | 62.9                                      |

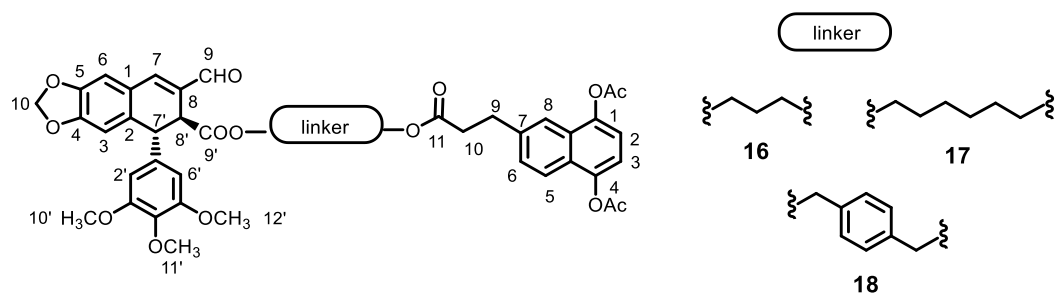

**Table S11:**  $^1\text{H}$  NMR for compound **16-18**,  $\delta$  in ppm ( $J$  in Hz)

| H           |       | 16                                                          | 17                                                                                                       | 18                                                                                                          |
|-------------|-------|-------------------------------------------------------------|----------------------------------------------------------------------------------------------------------|-------------------------------------------------------------------------------------------------------------|
| MHQ         | 2     | 7.21 <i>d</i> (8.0)                                         | 7.20 <i>d</i> (8.0)                                                                                      | 7.22 <i>d</i> (8.0)                                                                                         |
|             | 3     | 7.18 <i>d</i> (8.0)                                         | 7.17 <i>d</i> (8.0)                                                                                      | 7.18 <i>d</i> (8.0)                                                                                         |
|             | 5     | 7.78 <i>d</i> (8.0)                                         | 7.78 <i>d</i> (9.0)                                                                                      | 7.78 <i>d</i> (8.0)                                                                                         |
|             | 7     | 7.39 <i>dd</i><br>(1.8; 8.0)                                | 7.39 <i>dd</i><br>(0.8; 9.0)                                                                             | 7.39 <i>dd</i><br>(1.8; 8.0)                                                                                |
|             | 8     | 7.64 <i>d</i> (1.8)                                         | 7.66 <i>d</i> (0.8)                                                                                      | 7.66 <i>d</i> (1.8)                                                                                         |
|             | 9     | 3.08 <i>t</i> (8.0)                                         | 3.01 <i>t</i> (7.6)                                                                                      | 3.13 <i>t</i> (7.6)                                                                                         |
|             | 10    | 2.66 <i>t</i> (8.0)                                         | 2.67 <i>t</i> (7.6)                                                                                      | 2.74 <i>t</i> (7.6)                                                                                         |
|             | -OAc  | 2.43 <i>s</i> ; 2.45 <i>s</i>                               | 2.43 <i>s</i> ; 2.45 <i>s</i>                                                                            | 2.44 <i>s</i> ; 2.45 <i>s</i>                                                                               |
| linker      |       | 4.06 <i>t</i> (6.0)<br>1.88 <i>m</i><br>3.98 <i>t</i> (4.0) | 4.02 <i>t</i> (6.8)<br>1.54 <i>m</i><br>1.46 <i>m</i><br>1.23 <i>m</i><br>1.20 <i>m</i><br>3.97 <i>m</i> | 5.08 <i>d</i> (10.8)<br>5.06 <i>d</i> (10.8)<br>7.24 <i>d</i> (7.6)<br>7.10 <i>d</i> (7.6)<br>5.09 <i>m</i> |
| Cyclolignan | 3     | 6.47 <i>s</i>                                               | 6.50 <i>s</i>                                                                                            | 6.61 <i>s</i>                                                                                               |
|             | 6     | 6.87 <i>s</i>                                               | 6.87 <i>s</i>                                                                                            | 6.88 <i>s</i>                                                                                               |
|             | 7     | 7.33 <i>s</i>                                               | 7.41 <i>s</i>                                                                                            | 7.38 <i>s</i>                                                                                               |
|             | 9     | 9.59 <i>s</i>                                               | 9.59 <i>s</i>                                                                                            | 9.59 <i>s</i>                                                                                               |
|             | 10    | 5.98 <i>s</i>                                               | 5.98 <i>s</i>                                                                                            | 6.00 <i>s</i>                                                                                               |
|             | 2, 6' | 6.21 <i>s</i>                                               | 6.20 <i>s</i>                                                                                            | 6.20 <i>s</i>                                                                                               |
|             | 7'    | 4.59 <i>d</i> (4.0)                                         | 4.59 <i>d</i> (3.2)                                                                                      | 4.58 <i>d</i> (4)                                                                                           |
|             | 8'    | 2.82 <i>d</i> (3.6)                                         | 3.97 <i>m</i>                                                                                            | 4.04 <i>d</i> (4)                                                                                           |
| 10', 12'    |       | 3.73 <i>s</i>                                               | 3.73 <i>s</i>                                                                                            | 3.76 <i>s</i>                                                                                               |
| 11'         |       | 3.75 <i>s</i>                                               | 3.76 <i>s</i>                                                                                            | 3.81 <i>s</i>                                                                                               |



**Table S12:**  $^{13}\text{C}$  NMR for compound **16-18**,  $\delta$  in ppm.

| C           |                                    | 16          | 17             | 18          |
|-------------|------------------------------------|-------------|----------------|-------------|
| MHQ         | 1                                  | 144.3       | 145.5          | 144.3       |
|             | 2                                  | 117.9       | 119.4          | 118.1       |
|             | 3                                  | 117.1       | 118.6          | 117.4       |
|             | 4                                  | 144.0       | 145.5          | 144.0       |
|             | 4a                                 | 126.4       | 129.7          | 122.2       |
|             | C <sub>1</sub> CO-OCH <sub>3</sub> | 169.4; 21.0 | 170.9; 22.6    | 169.5; 21.3 |
|             | C <sub>4</sub> CO-OCH <sub>3</sub> | 169.4; 21.0 | 170.9; 22.6    | 169.6; 21.4 |
|             | 5                                  | 122.0       | 123.5          | 122.2       |
|             | 6                                  | 128.0       | 129.3          | 128.0       |
|             | 7                                  | 147.4       | 141.0          | 137.1       |
|             | 8                                  | 120.1       | 121.7          | 120.2       |
|             | 8a                                 | 127.7       | 129.7          | 182.1       |
|             | 9                                  | 31.1        | 37.2           | 35.6        |
|             | 10                                 | 27.7        | 32.8           | 31.1        |
|             | 11                                 | 171.6       | 173.2          | 171.6       |
| linker      |                                    |             |                | 133.7       |
|             |                                    | 35.5        |                | 128.3       |
|             |                                    | 60.7        | 25.2 28.4 38.0 | 127.8       |
|             |                                    | 61.6        | 39.0 63.9 65.1 | 133.1       |
|             |                                    |             |                | 66.0        |
| Cyclolignan |                                    |             |                | 66.5        |
|             | 1                                  | 125.0       | 126.7          | 125.3       |
|             | 2                                  | 133.1       | 135.3          | 133.8       |
|             | 3                                  | 110.0       | 111.6          | 117.1       |
|             | 4                                  | 150.5       | 151.9          | 150.4       |
|             | 5                                  | 108.9       | 151.9          | 150.1       |
|             | 6                                  | 147.4       | 110.4          | 110.0       |
|             | 7                                  | 133.7       | 146.9          | 145.6       |
|             | 8                                  | 191.2       | 134.8          | 133.1       |
|             | 9                                  | 101.8       | 192.8          | 191.2       |
|             | 10                                 | 125.0       | 103.3          | 101.8       |
|             | 1'                                 | 137.0       | 35.6           | 135.7       |
|             | 2', 6'                             | 104.8       | 107.0          | 104.8       |
|             | 3', 5'                             | 153.2       | 154.7          | 153.2       |
|             | 4'                                 | 139.4       | 138.7          | 136.9       |
|             | 7'                                 | 46.4        | 47.8           | 46.4        |
|             | 8'                                 | 44.7        | 46.1           | 44.4        |
|             | 9'                                 | 172.4       | 174.2          | 172.4       |
|             | 10', 12'                           | 60.7        | 57.7           | 56.1        |
|             | 11'                                | 56.1        | 62.3           | 60.7        |

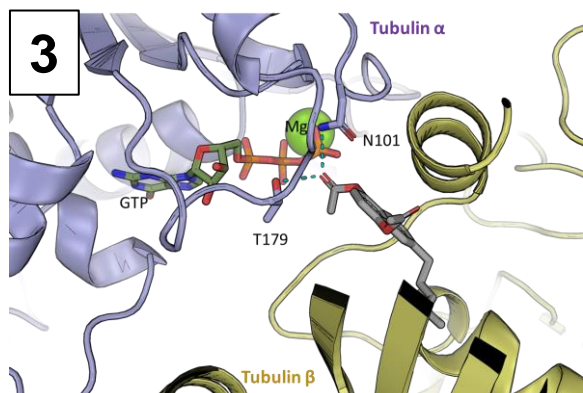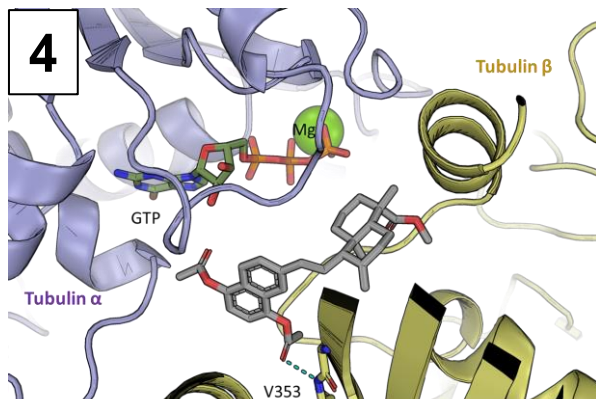

**Figure S1:** Docking complexes of precursors **3** and **4** in the colchicine site of tubulin. GTP, the inhibitors, and those residues that interact with the inhibitors via hydrogen bonds are shown atomistically. The two protomers tubulin and are shown in yellow and purple, respectively



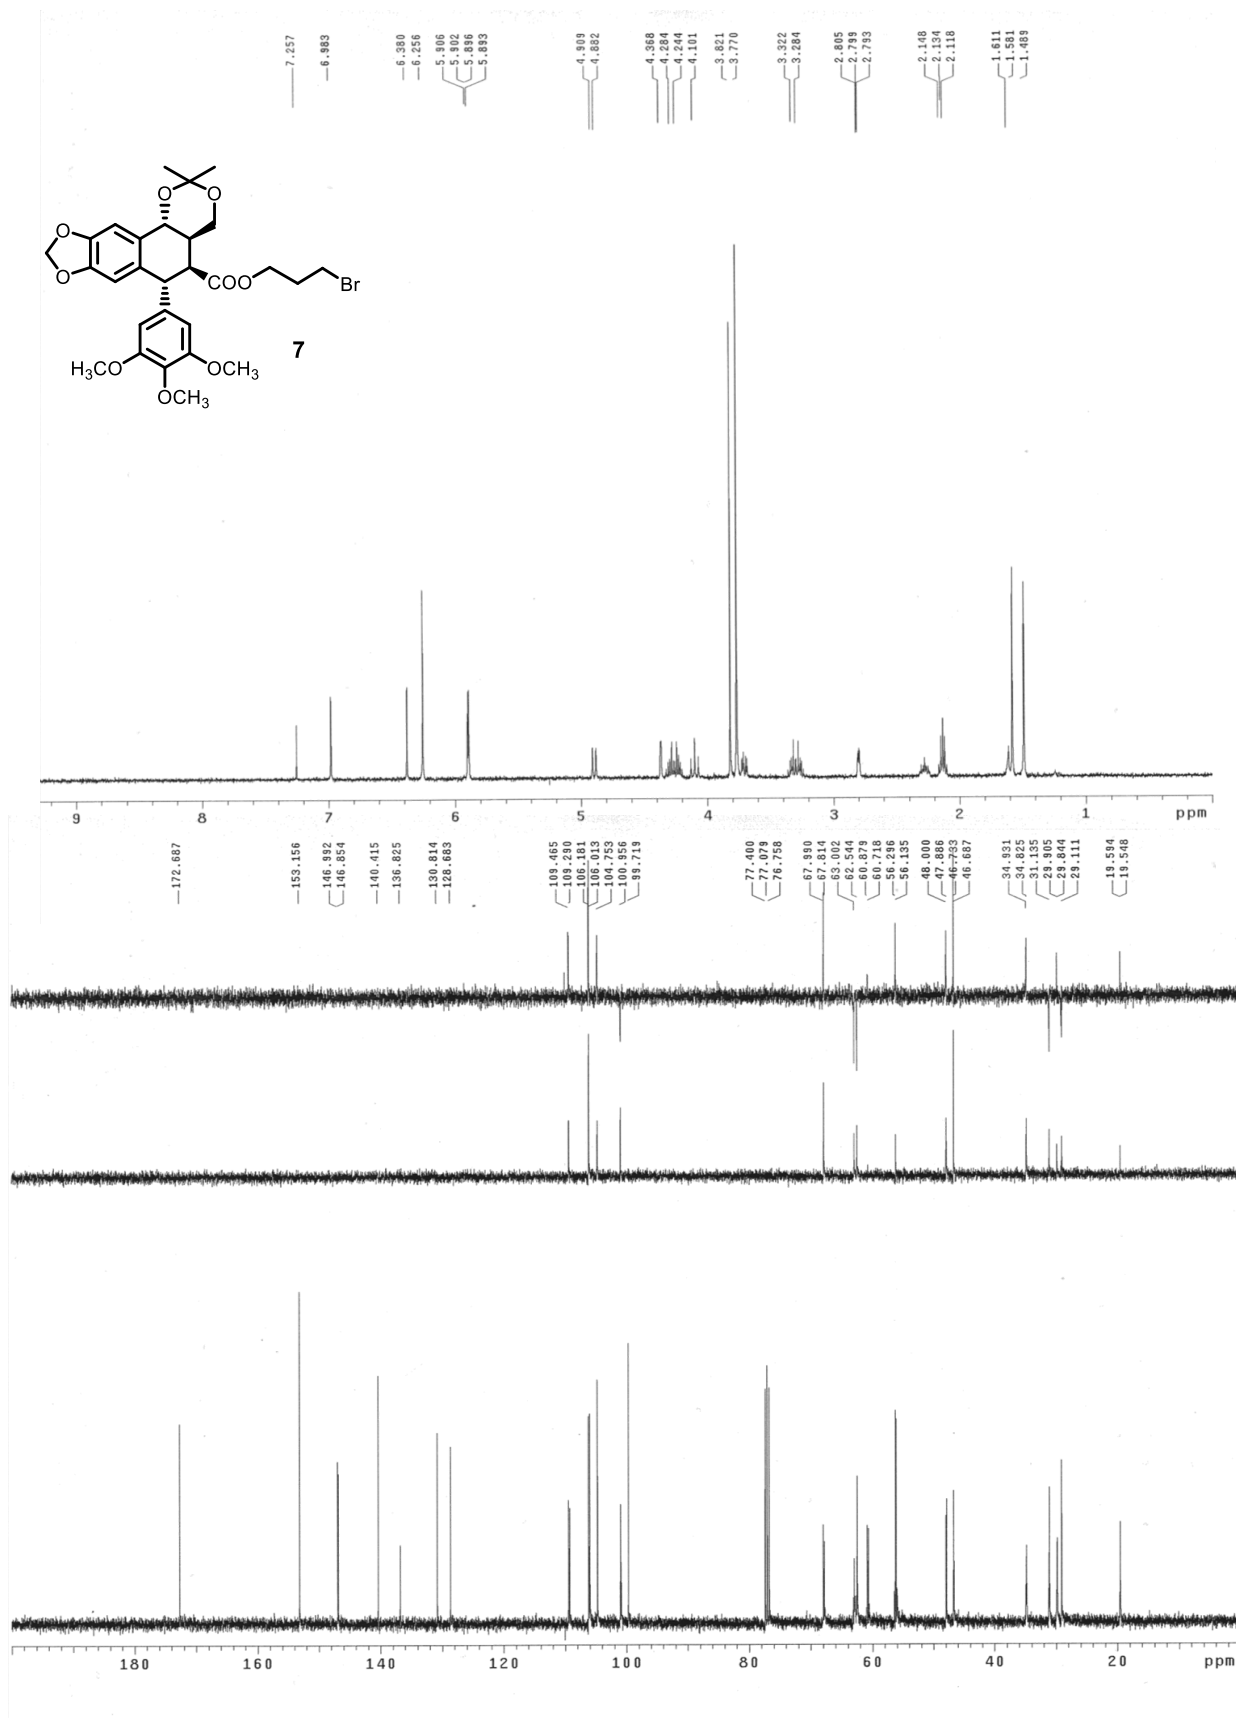

**Figure S2:** <sup>1</sup>H and <sup>13</sup>C NMR spectra for compound 7

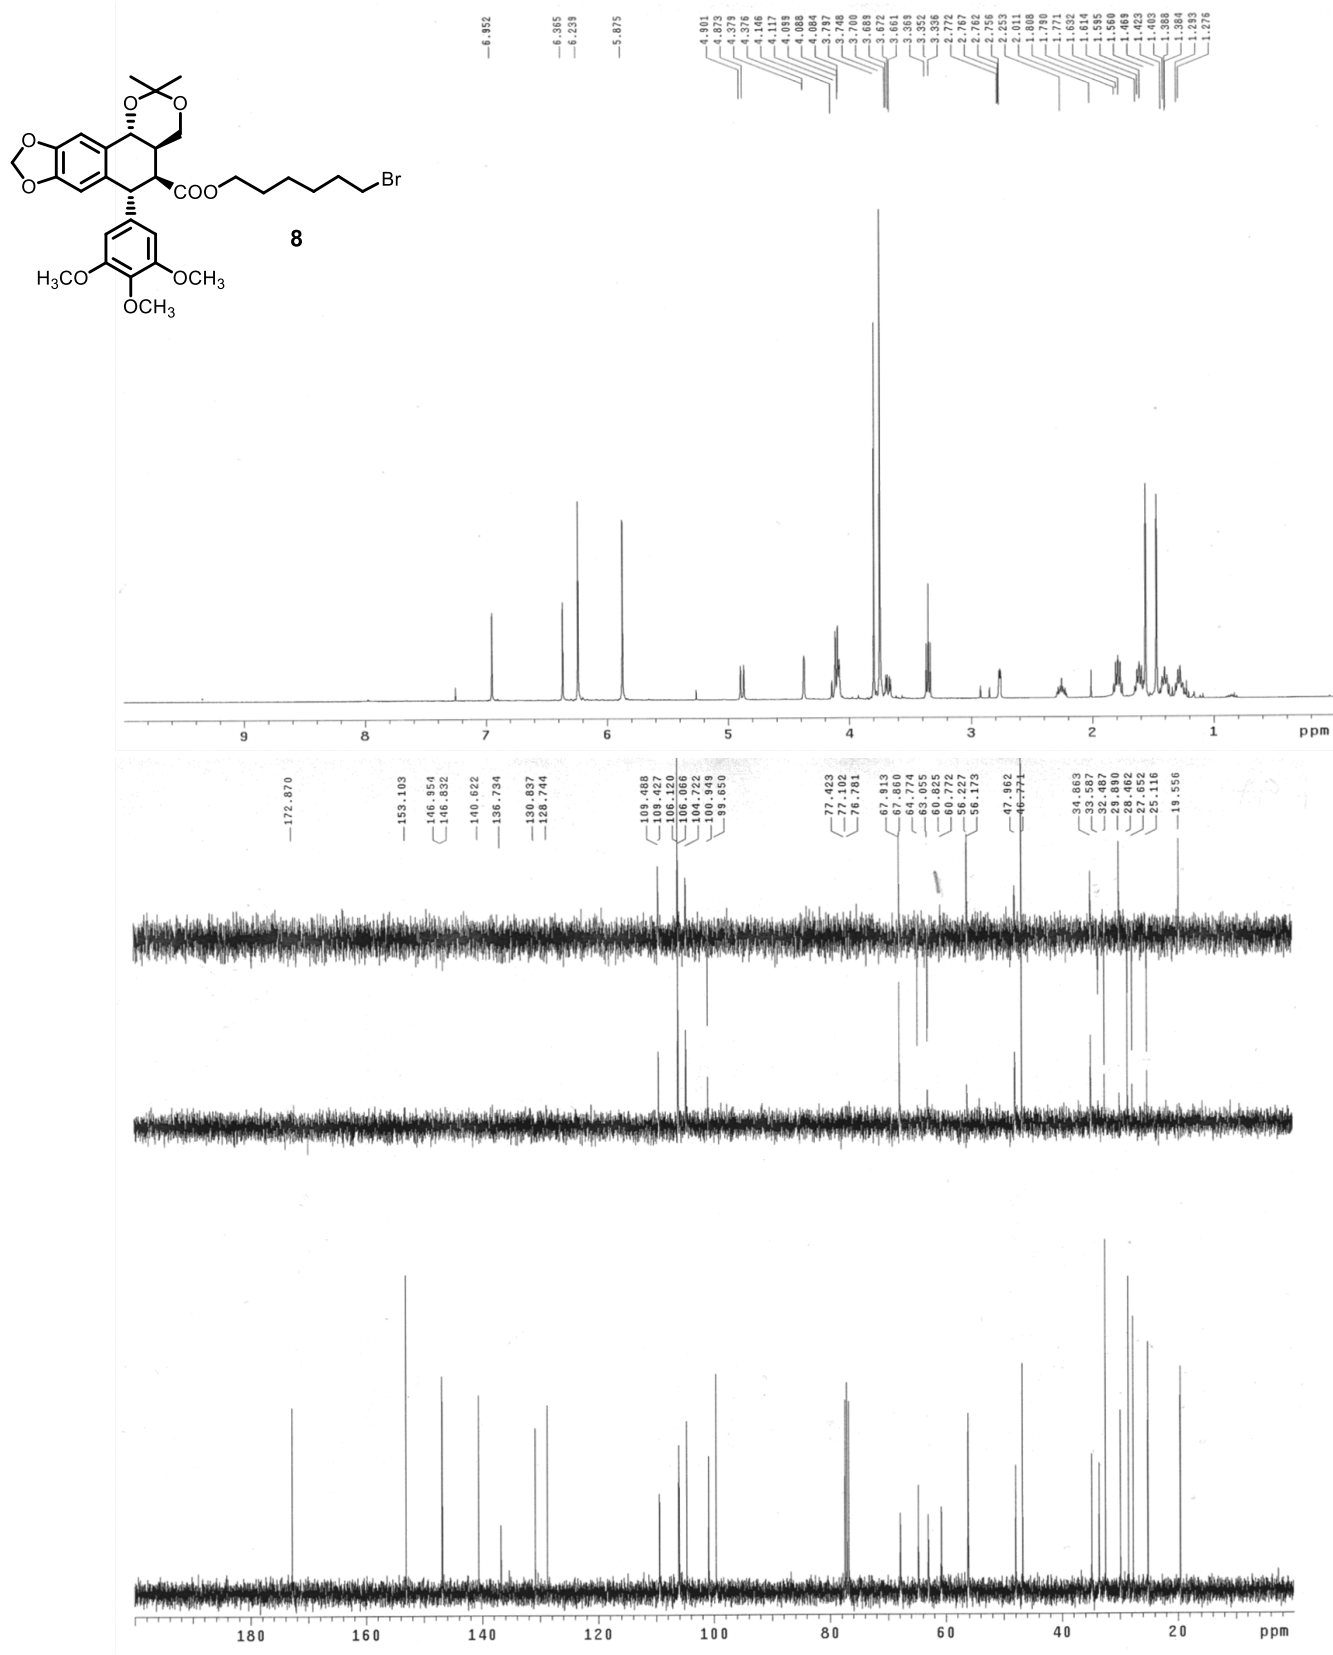

**Figure S3:** <sup>1</sup>H and <sup>13</sup>C NMR spectra for compound **8**

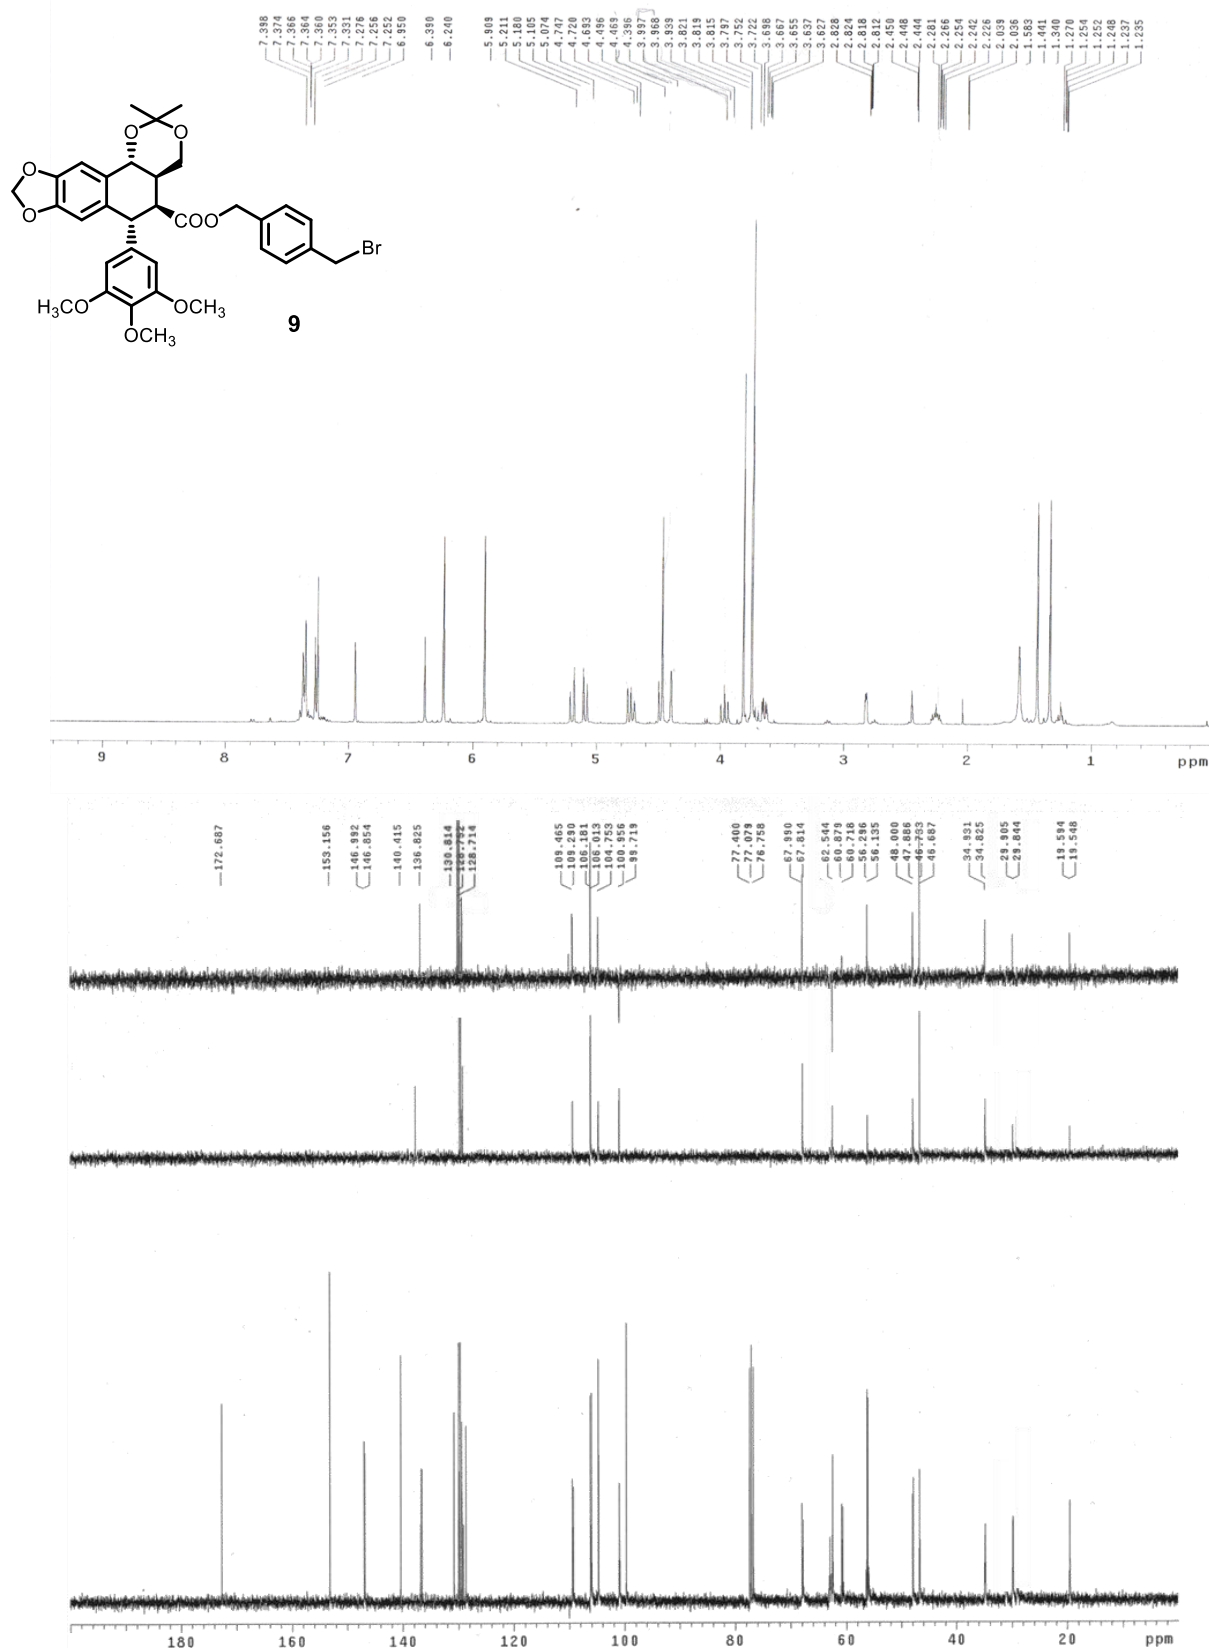

**Figure S4:** <sup>1</sup>H and <sup>13</sup>C NMR spectra for compound **9**

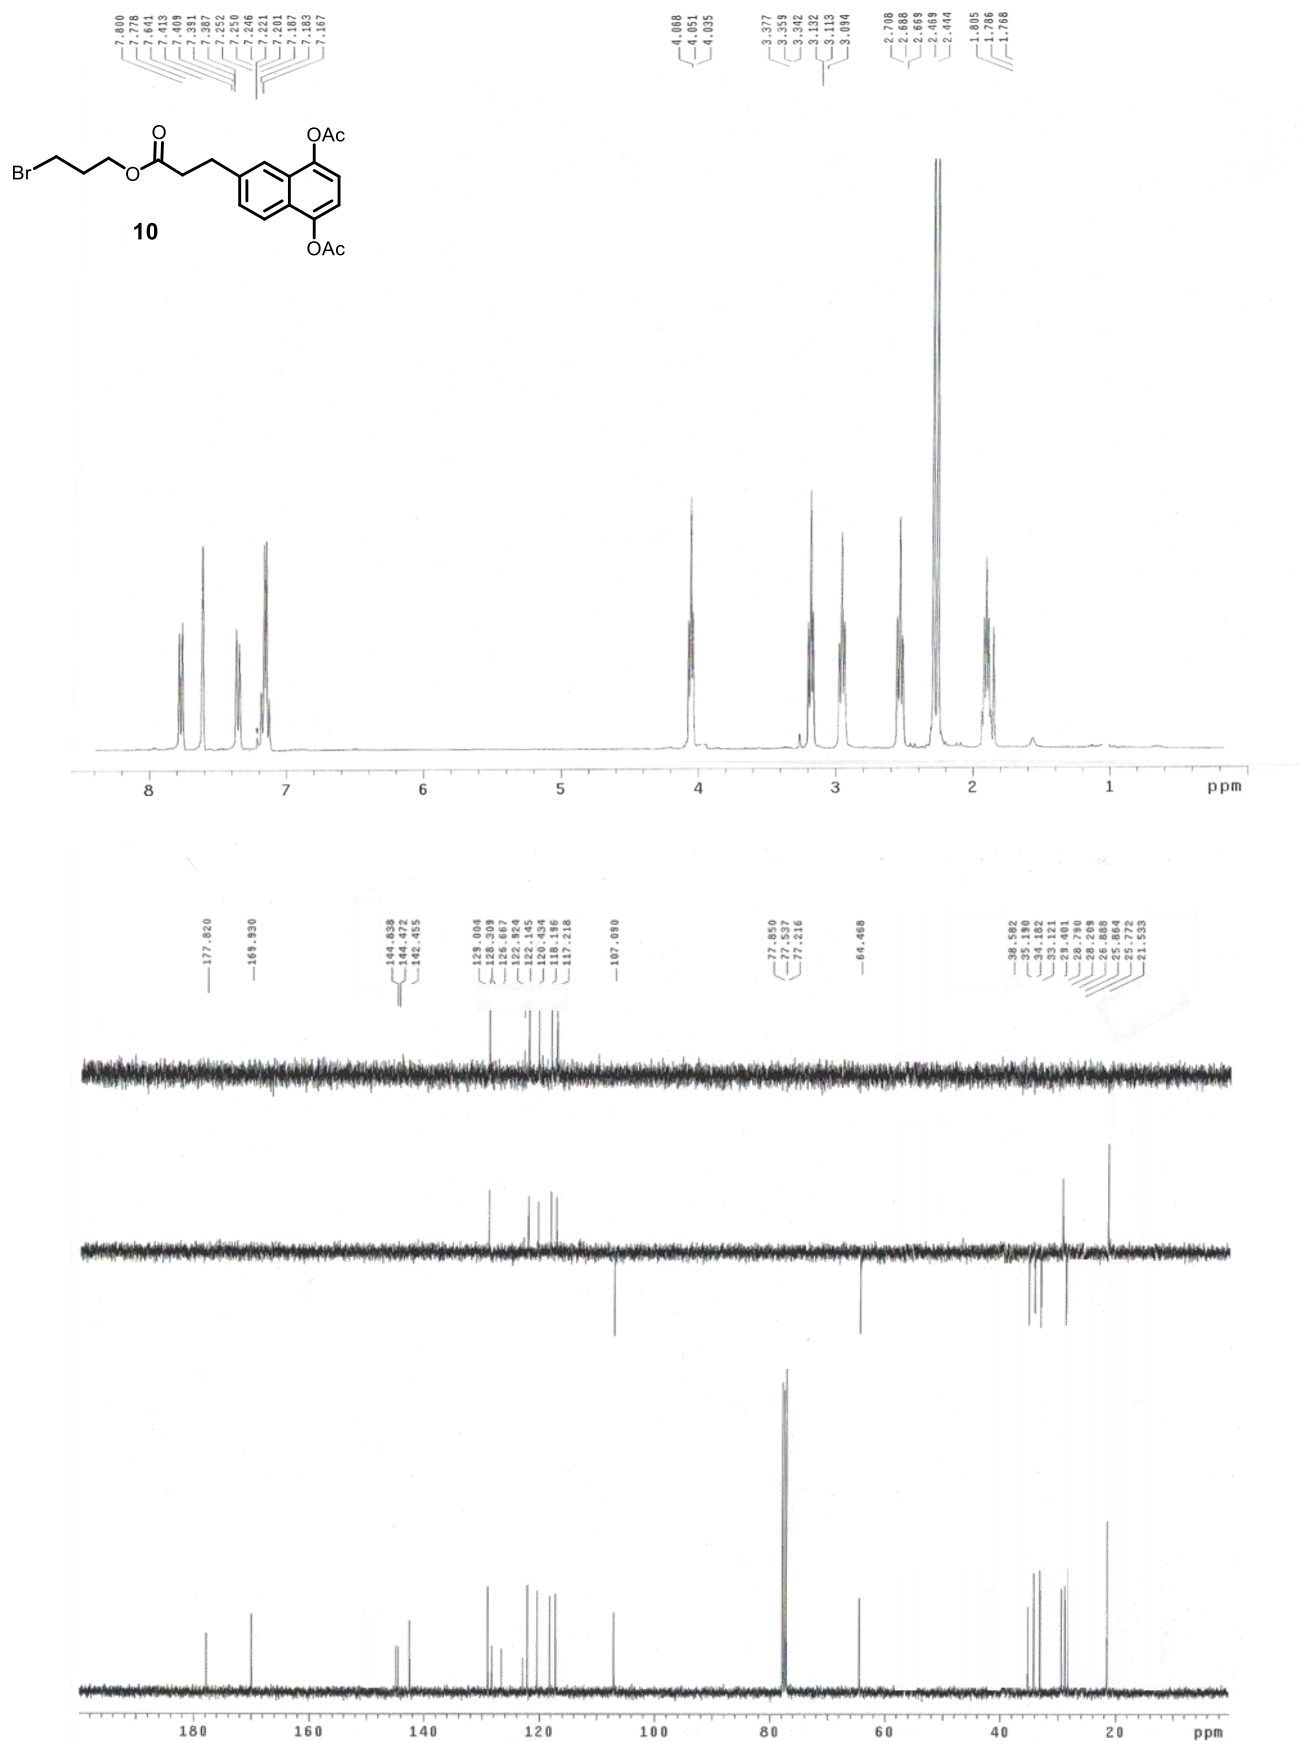

**Figure S5:**  $^1\text{H}$  and  $^{13}\text{C}$  NMR spectra for compound **10**

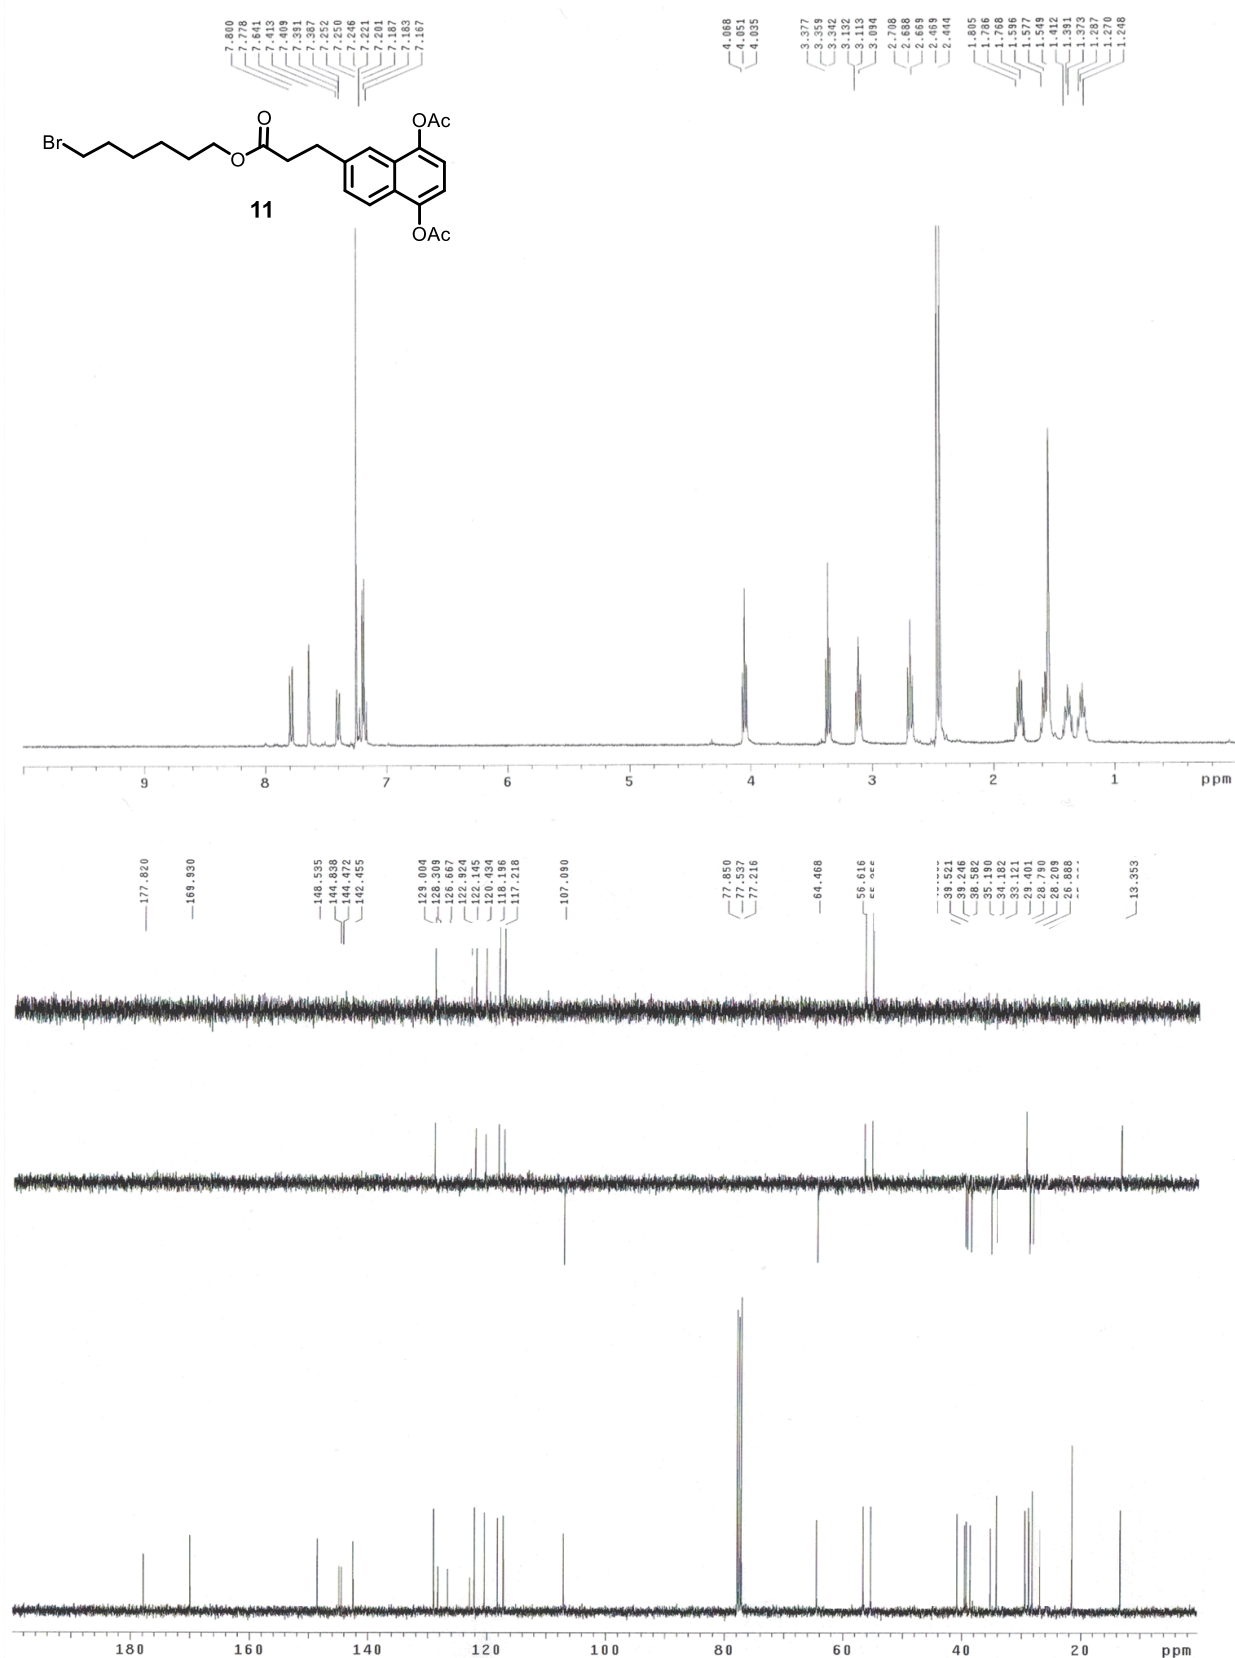

Figure S6: <sup>1</sup>H and <sup>13</sup>C NMR spectra for compound 11

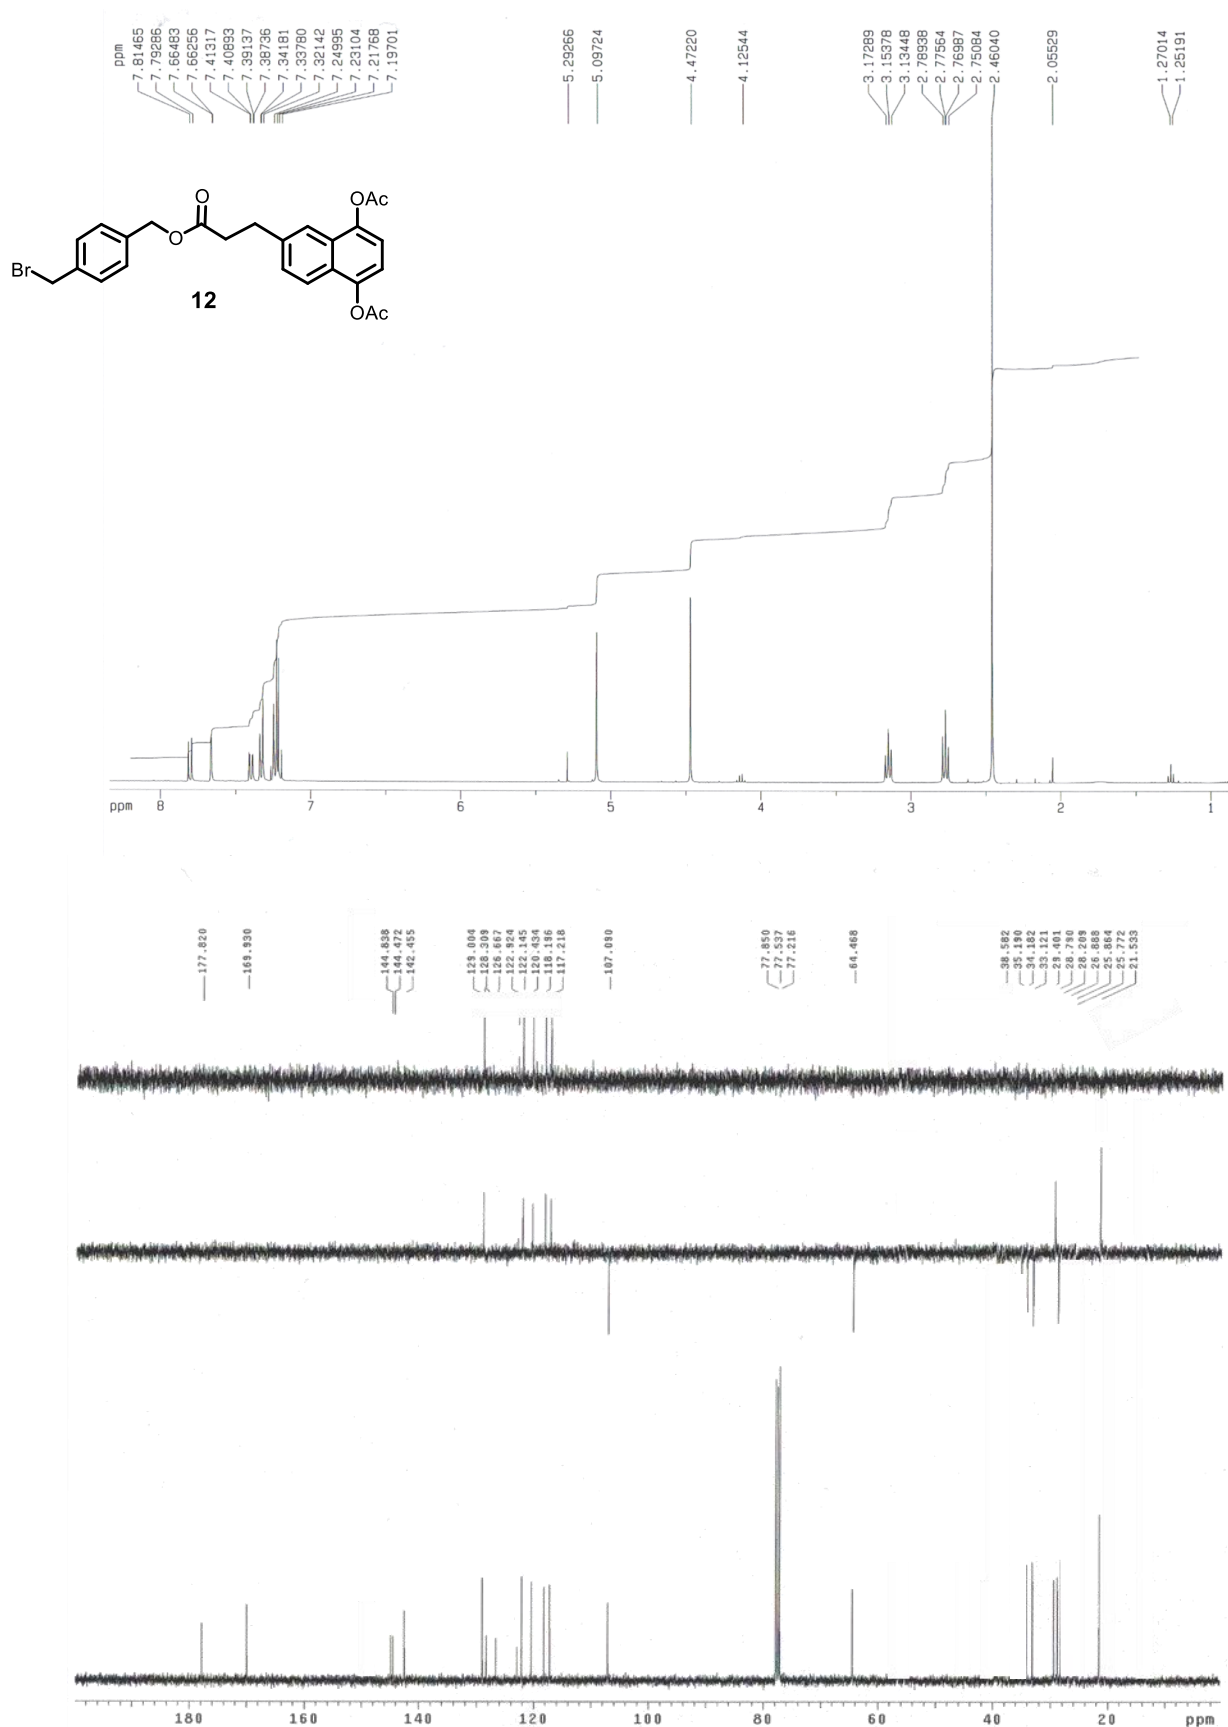

**Figure S7:** <sup>1</sup>H and <sup>13</sup>C NMR spectra for compound **12**

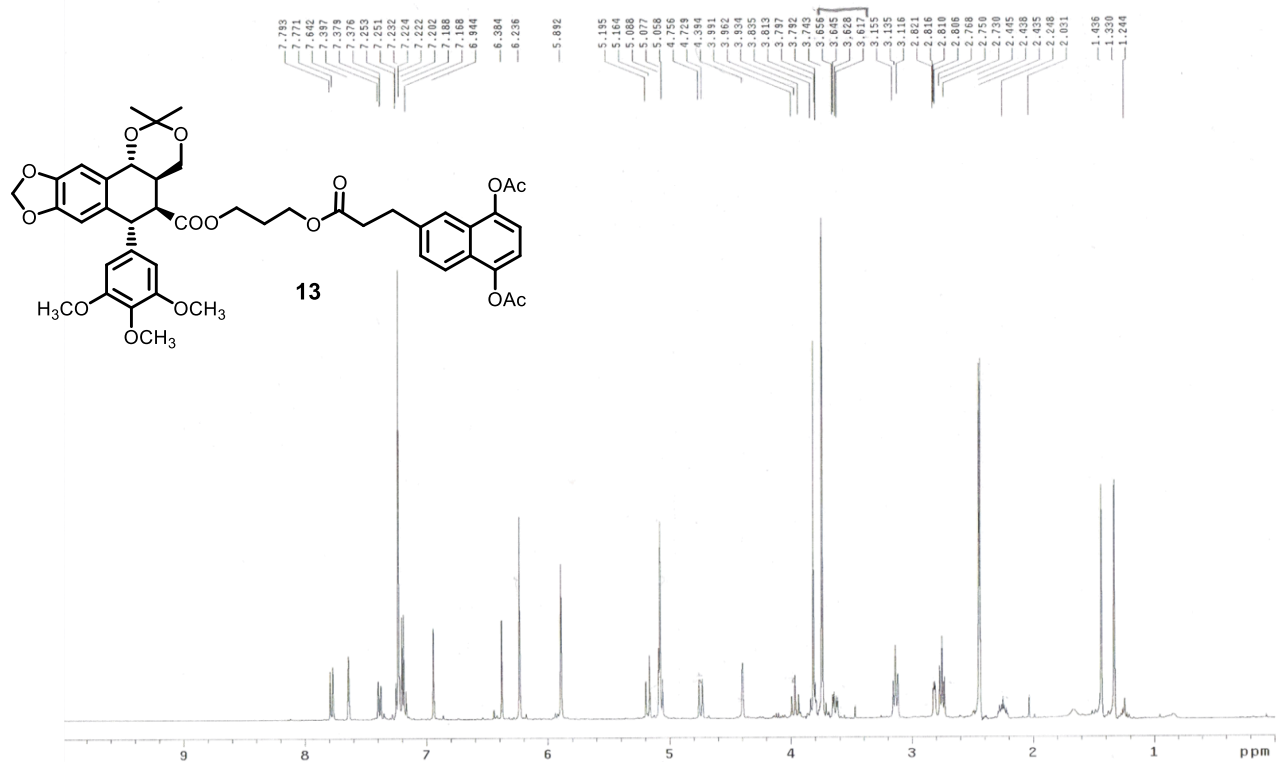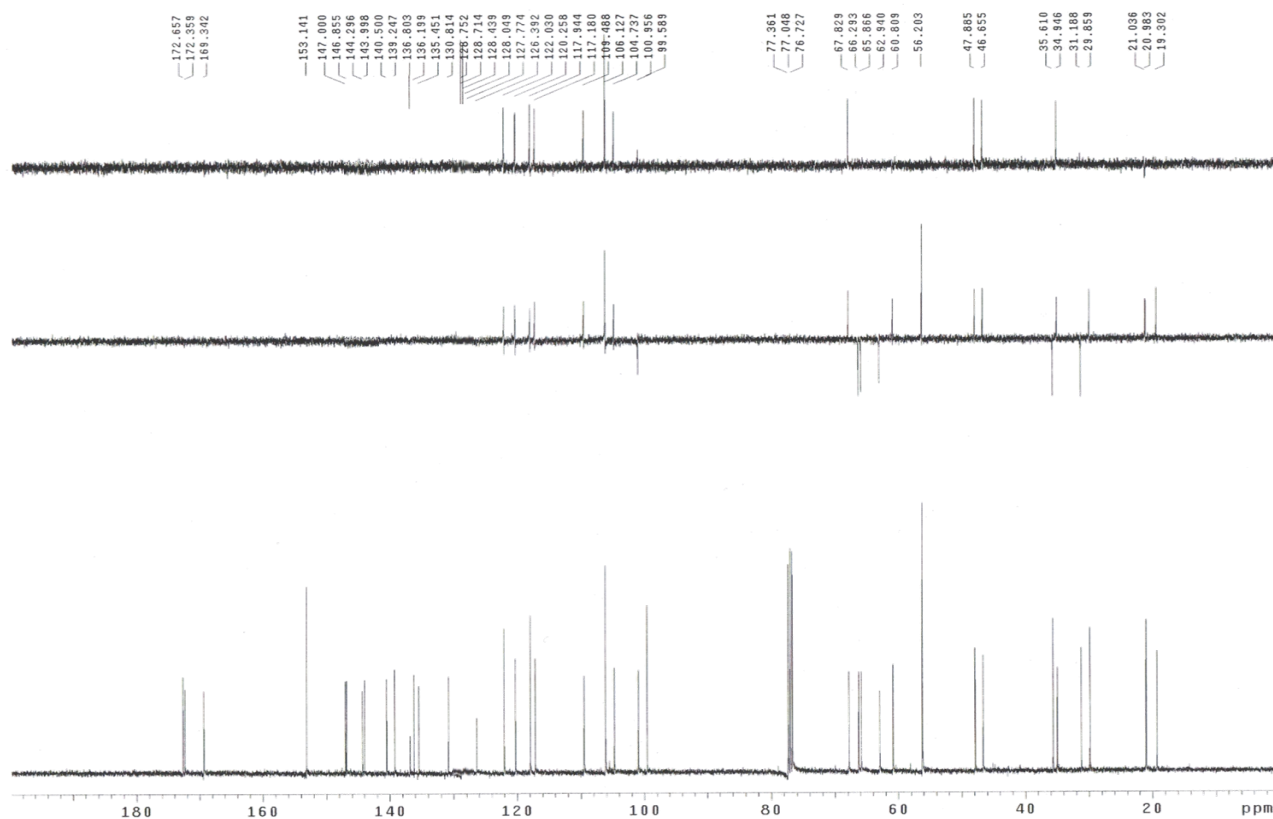

**Figure S8:** <sup>1</sup>H and <sup>13</sup>C NMR spectra for compound **13**

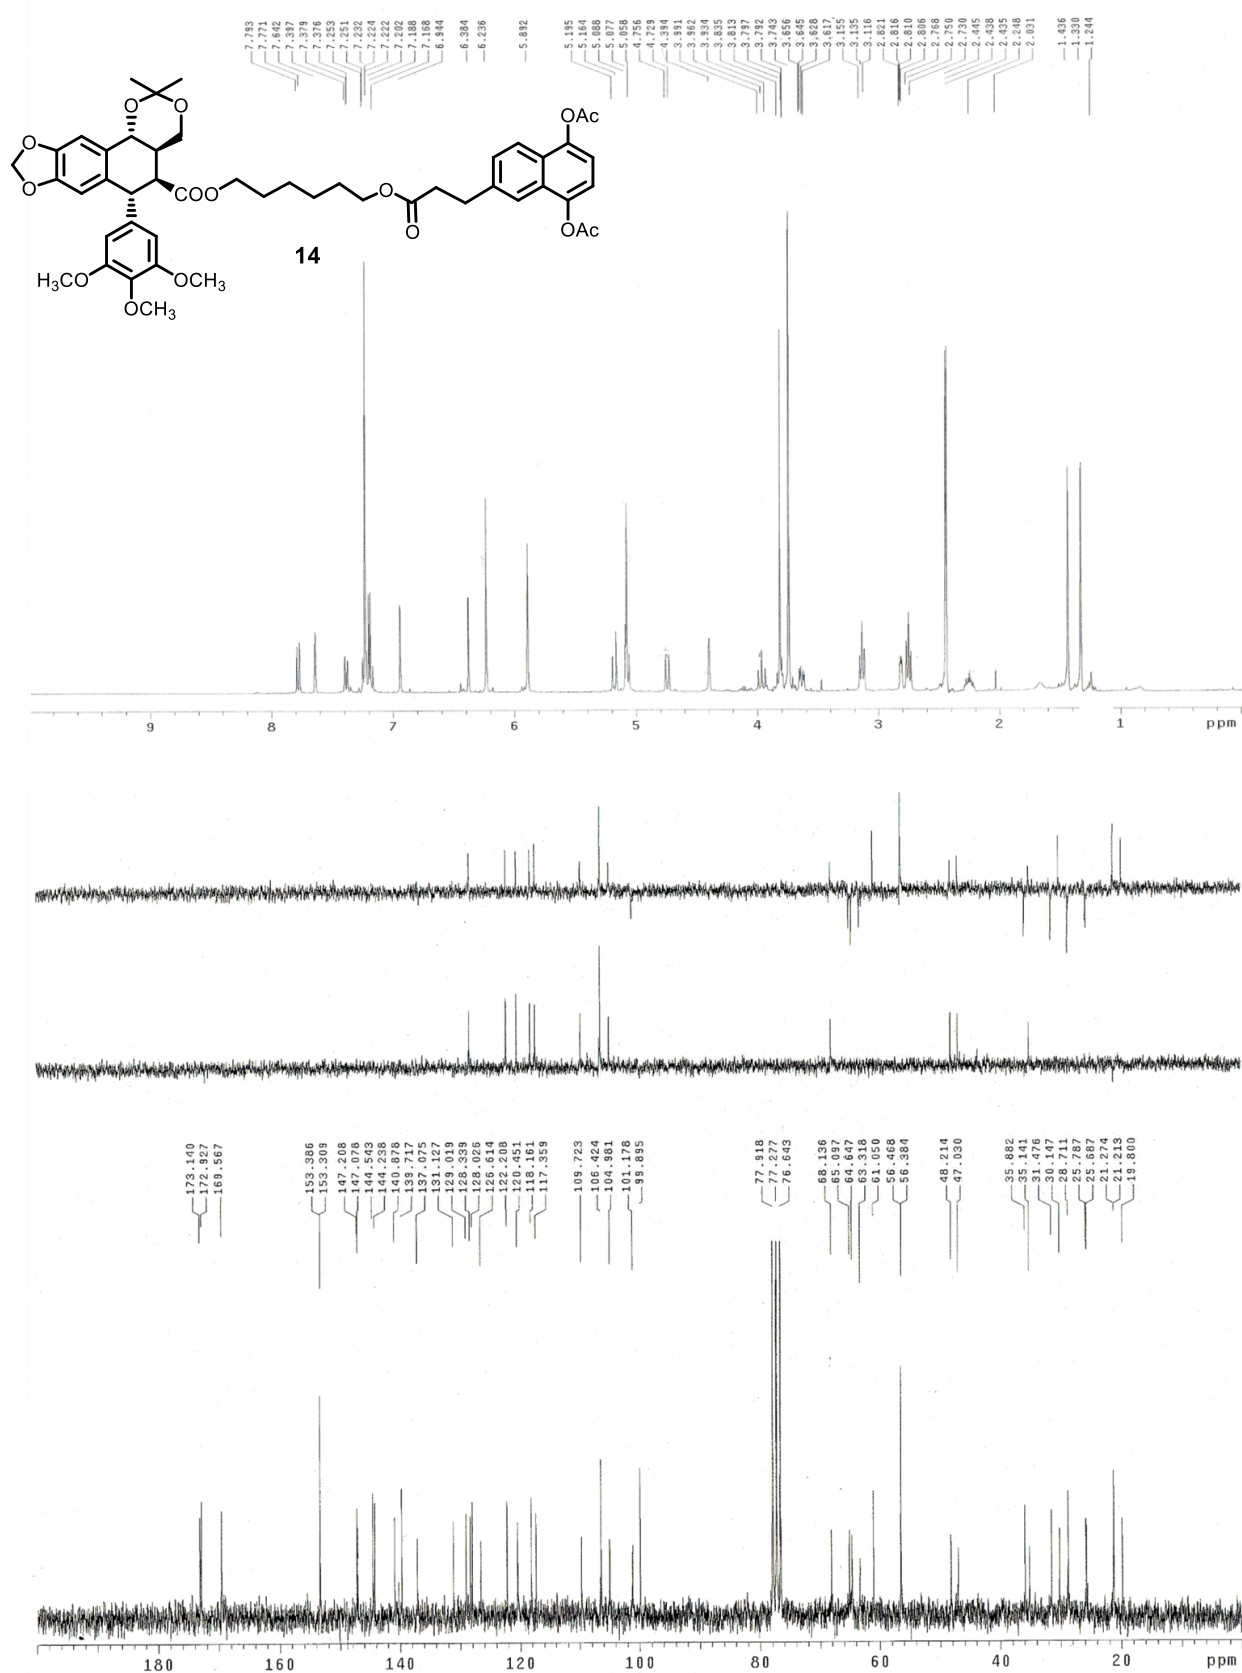

**Figure S9:** <sup>1</sup>H and <sup>13</sup>C NMR spectra for compound **14**



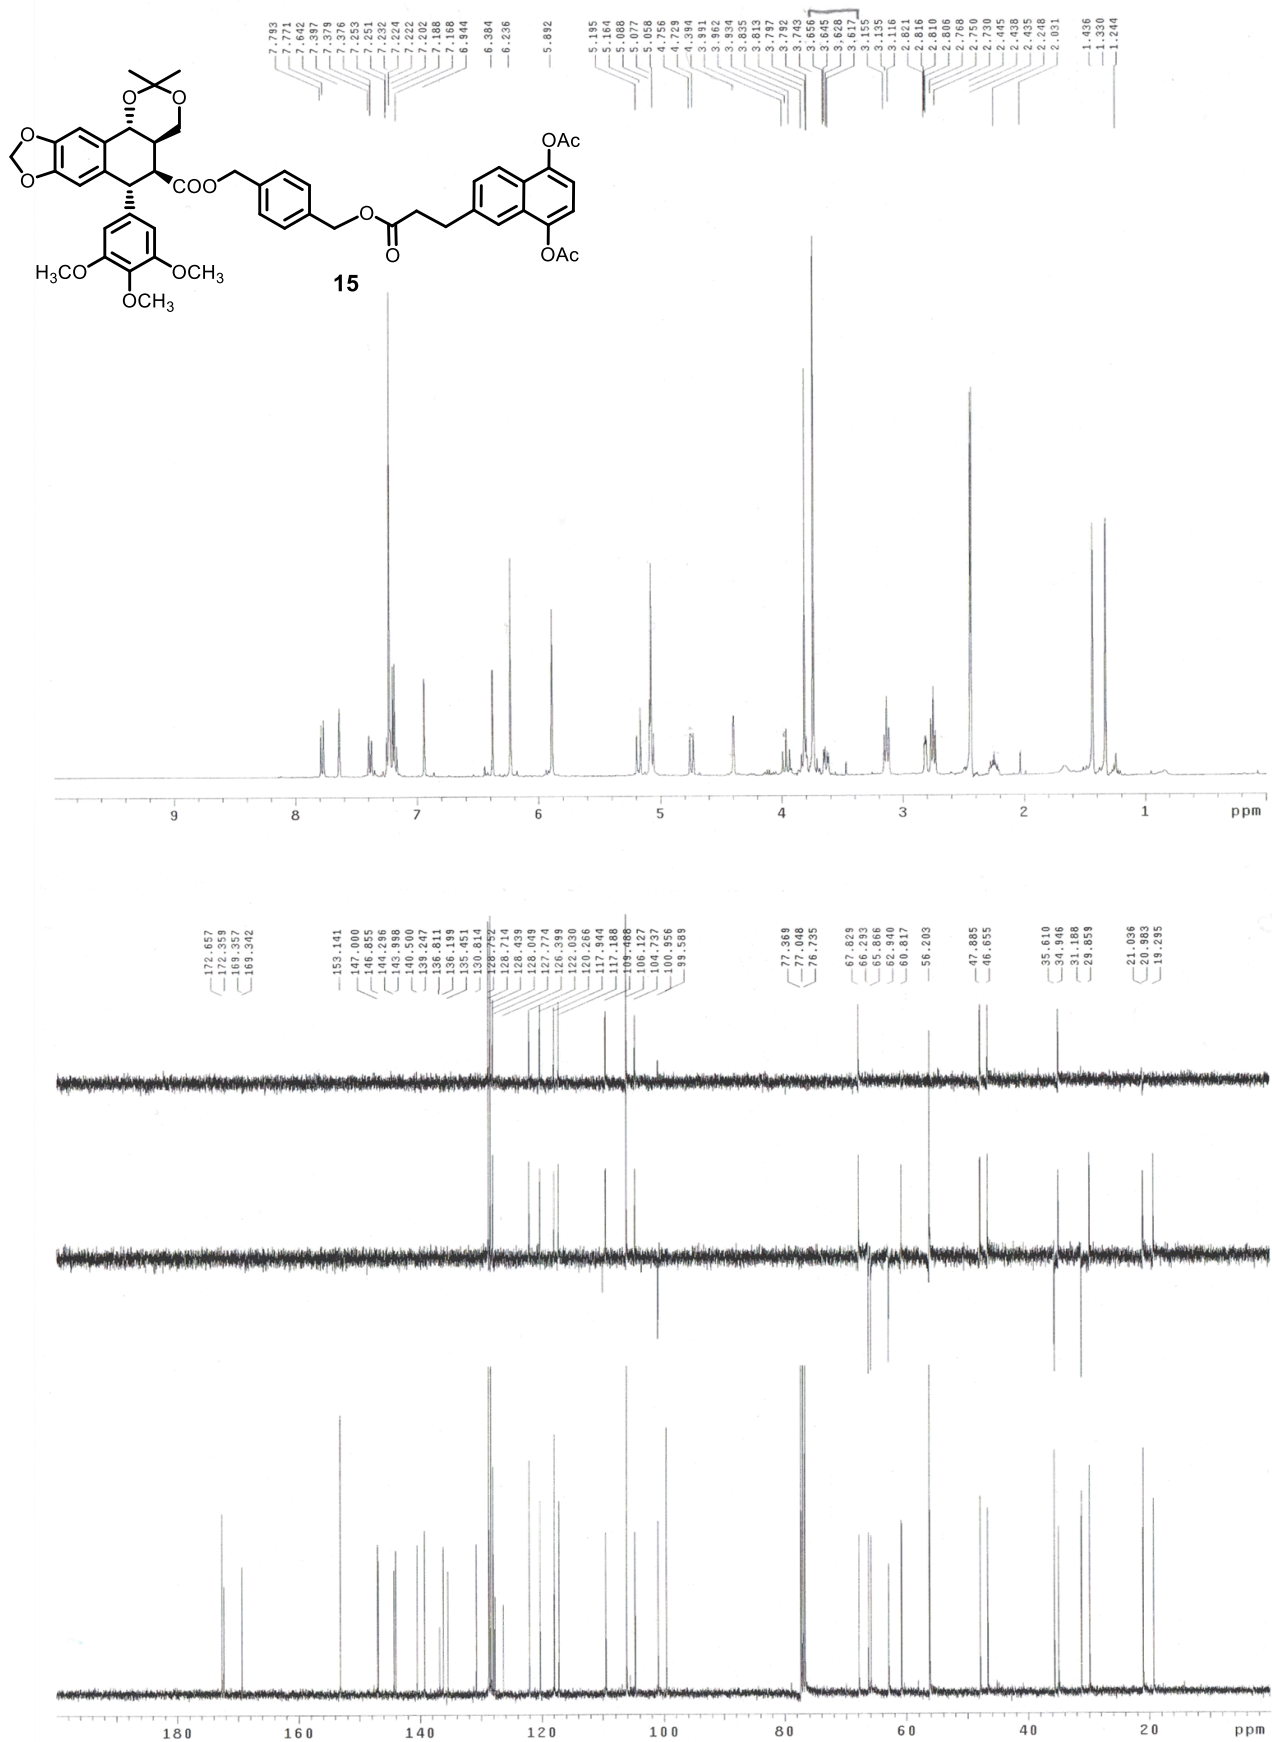

**Figure S10:** <sup>1</sup>H and <sup>13</sup>C NMR spectra for compound **15**

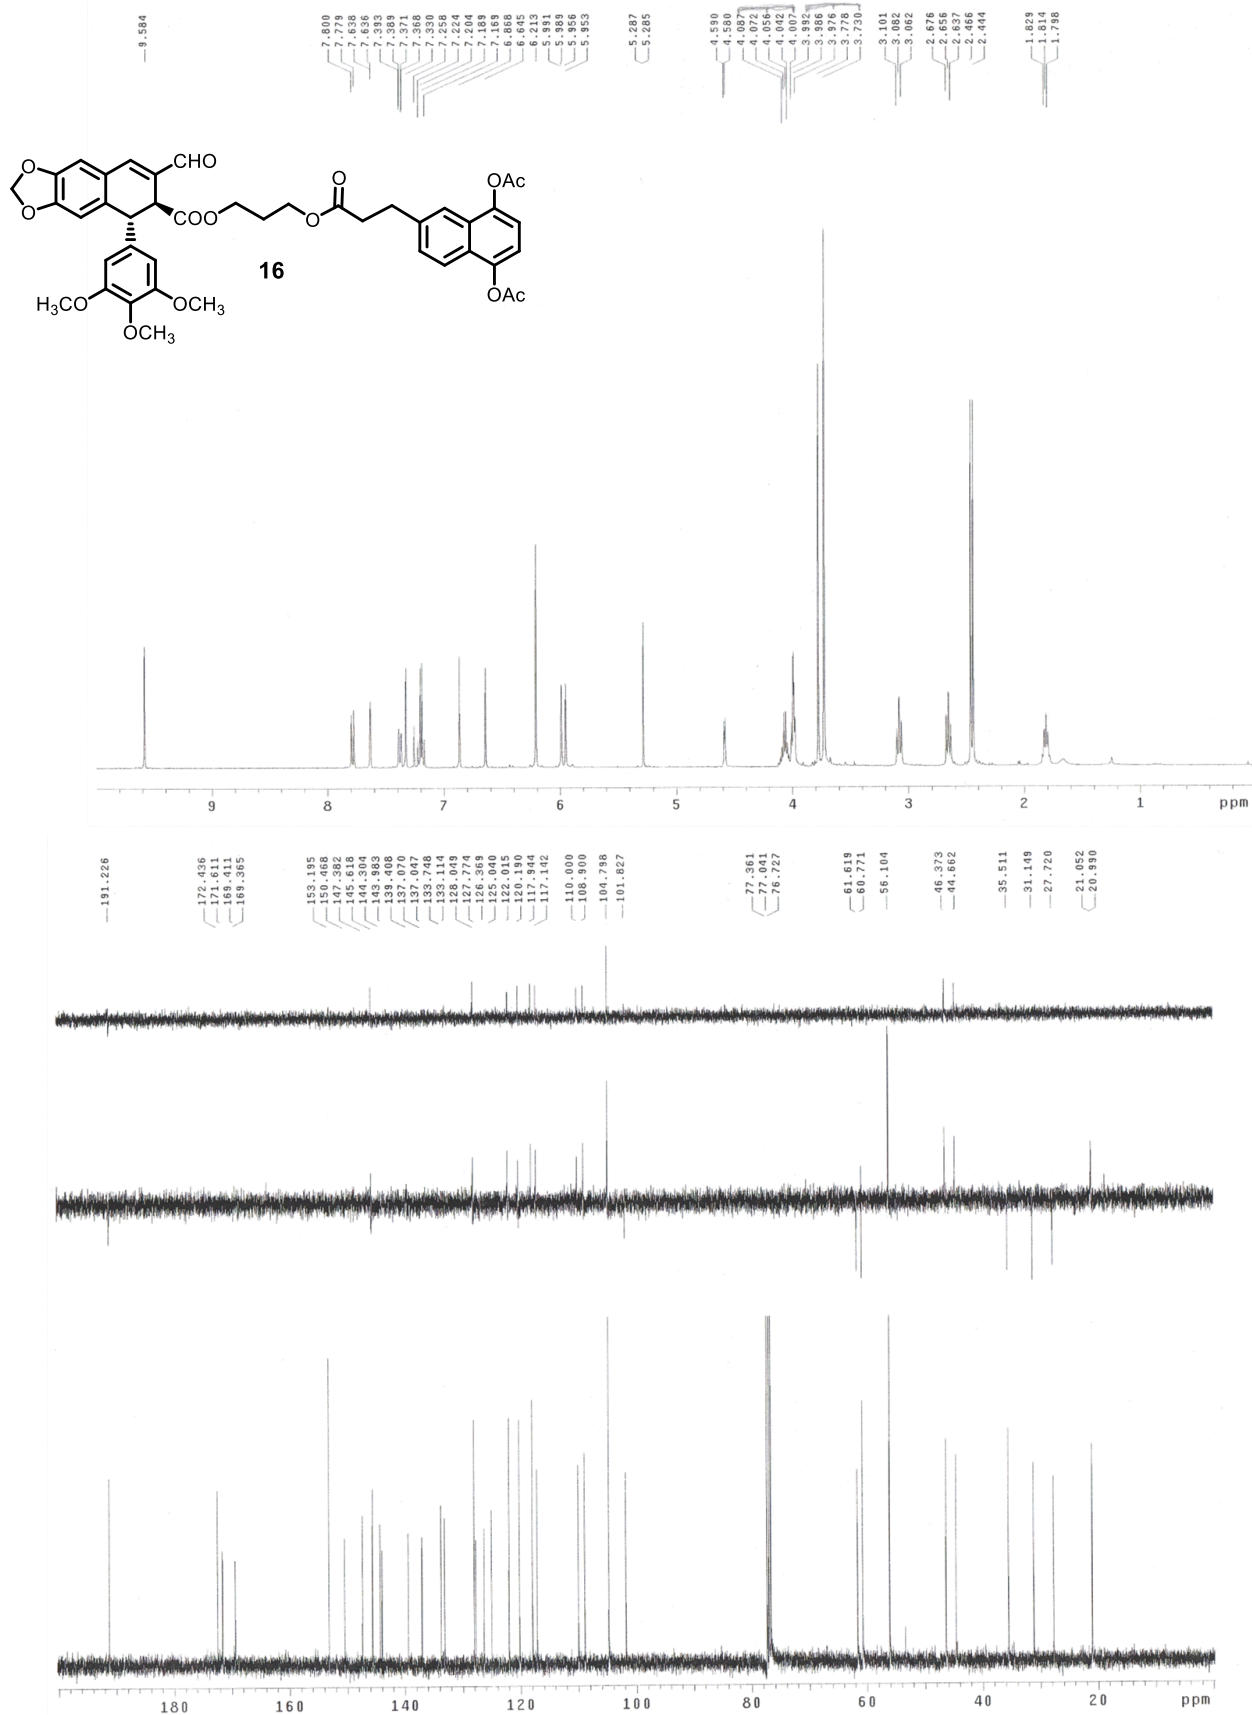

**Figure S11:** <sup>1</sup>H and <sup>13</sup>C NMR spectra for compound **16**

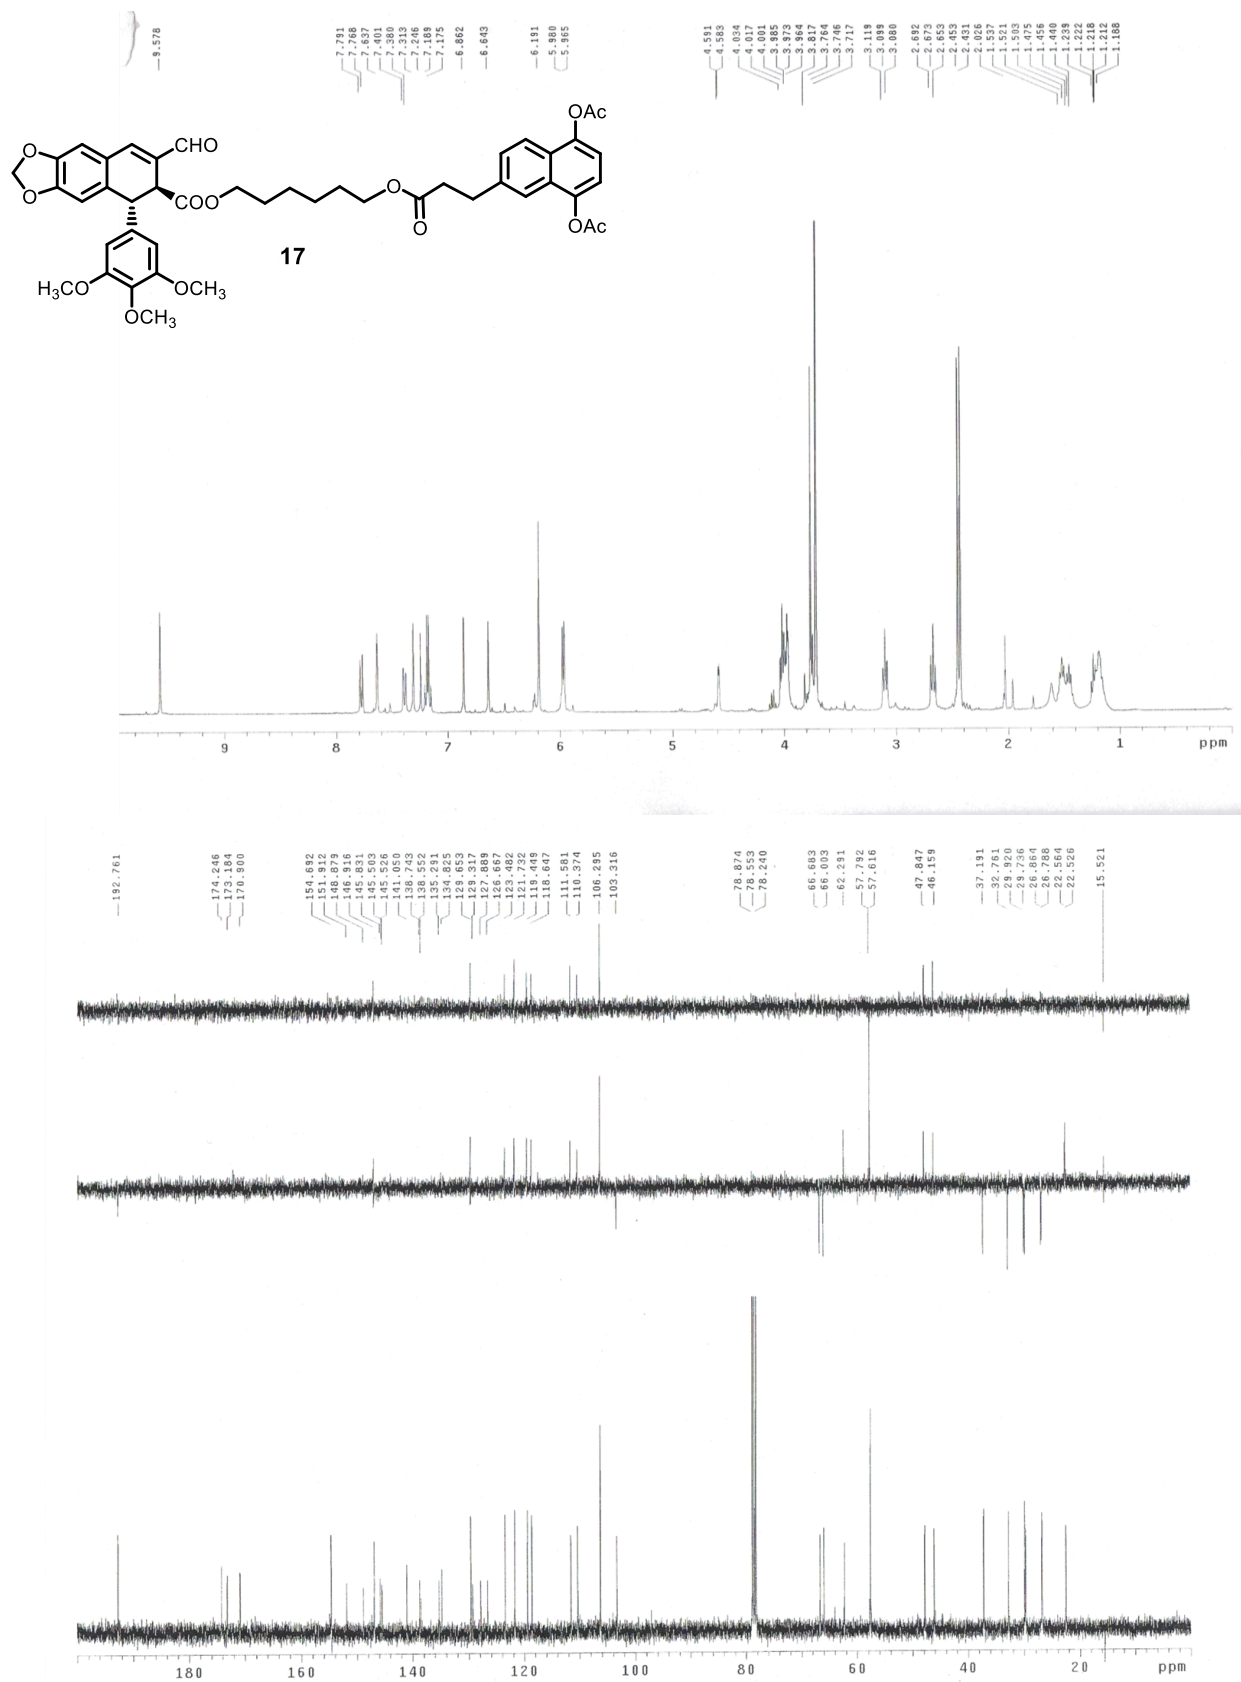

**Figure S12:**  $^1\text{H}$  and  $^{13}\text{C}$  NMR spectra for compound 17

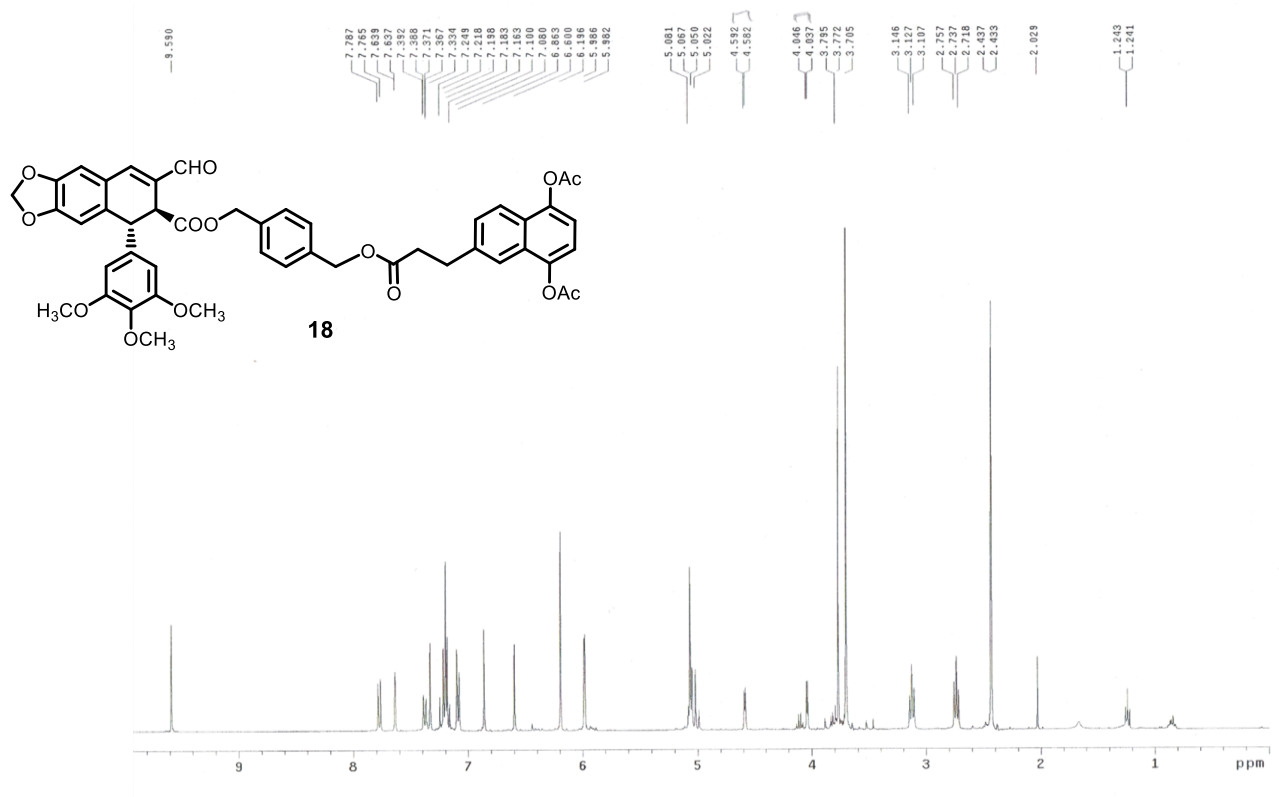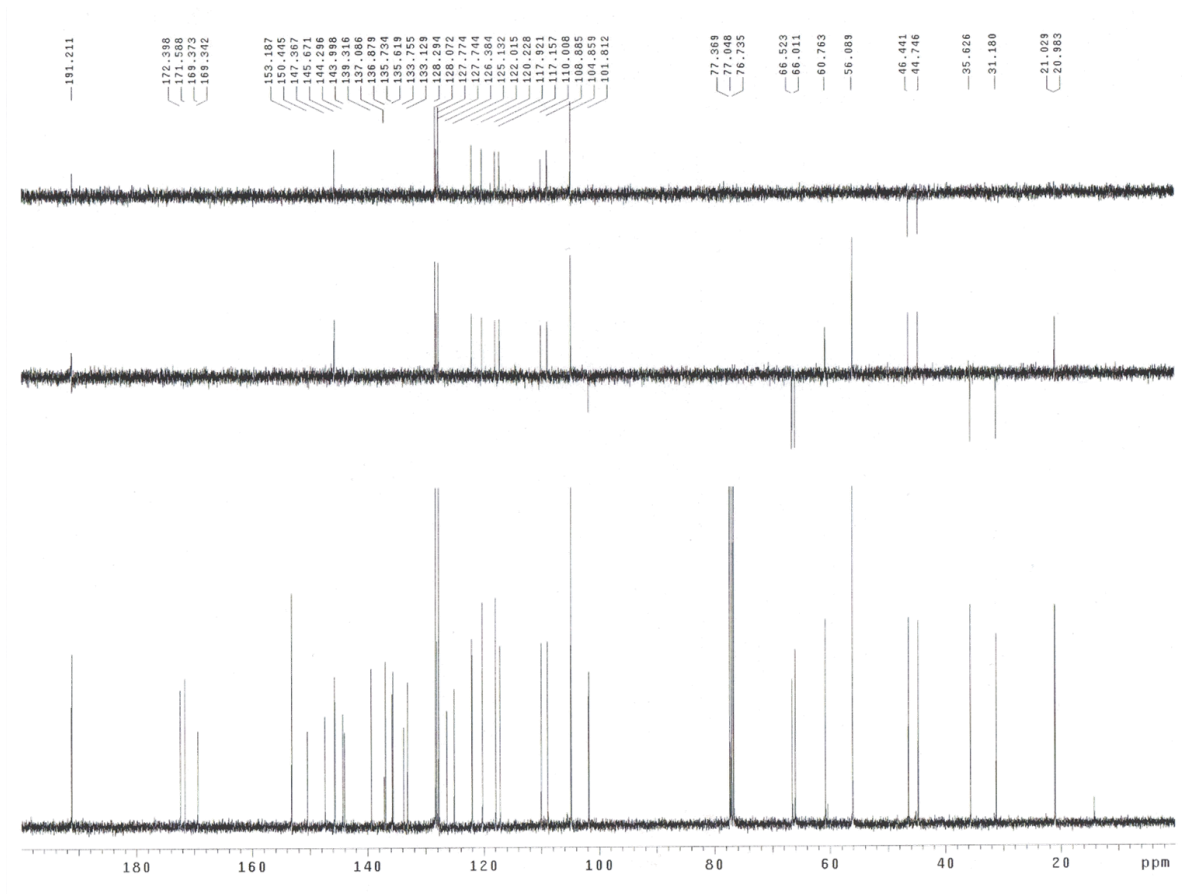

**Figure S13:**  $^1\text{H}$  and  $^{13}\text{C}$  NMR spectra for compound **18**
